# Brain Connectivity and Behavioral Changes in a Spaceflight Analog Environment with Elevated CO<sub>2</sub>

Heather R. McGregor<sup>1</sup>, Jessica K. Lee<sup>2</sup>, Edwin R. Mulder<sup>2</sup>, Yiri E. De Dios<sup>3</sup>, Nichole E. Beltran<sup>3</sup>, Igor S. Kofman<sup>3</sup>, Jacob J. Bloomberg<sup>4</sup>, Ajitkumar P. Mulavara<sup>3</sup> & Rachael D. Seidler<sup>1\*</sup>

<sup>1</sup> Department of Applied Physiology and Kinesiology, University of Florida, Gainesville, FL;

<sup>2</sup> Institute of Aerospace Medicine, German Aerospace Center, Cologne, Germany;

<sup>3</sup> KBR, Houston, TX;

<sup>4</sup> NASA Johnson Space Center, Houston, TX;

HRM analyzed fMRI data and brain-behavior associations. JKL and YED analyzed behavioral data. JKL collected data. JKL, NEG, ISK set up the experiment. RDS, ERM, JJB, APM designed the experiment and secured funding. HRM drafted the manuscript. HRM, JKL, ERM, JJB, RDS edited the manuscript.

**Declarations of interest:** None

**\*Corresponding author:**

Rachael D. Seidler, Ph.D.

University of Florida

1864 Stadium Rd.

Gainesville, FL 32611

Email: rachaelseidler@ufl.edu

**Keywords**

Bed Rest, Spaceflight, CO<sub>2</sub>, Resting-state fMRI, Functional Connectivity, Cognition, Sensorimotor

36 **ABSTRACT**

37

38 Astronauts are exposed to microgravity and elevated CO<sub>2</sub> levels onboard the International Space  
39 Station. Little is known about how microgravity and elevated CO<sub>2</sub> combine to affect the brain  
40 and sensorimotor performance during and after spaceflight. Here we examined changes in  
41 resting-state functional connectivity (FC) and sensorimotor behavior associated with a  
42 spaceflight analog environment. Participants underwent 30 days of strict 6° head-down tilt bed  
43 rest with elevated ambient CO<sub>2</sub> (HDBR+CO<sub>2</sub>). Resting-state functional magnetic resonance  
44 imaging and sensorimotor assessments were collected 13 and 7 days prior to bed rest, on days 7  
45 and 29 of bed rest, and 0, 5, 12, and 13 days following bed rest. We assessed the time course of  
46 FC changes from before, during, to after HDBR+CO<sub>2</sub>. We then compared the observed  
47 connectivity changes with those of a HDBR control group, which underwent HDBR in standard  
48 ambient air. Moreover, we assessed associations between post-HDBR+CO<sub>2</sub> FC changes and  
49 alterations in sensorimotor performance. HDBR+CO<sub>2</sub> was associated with significant changes in  
50 functional connectivity between vestibular, visual, somatosensory and motor brain areas. Several  
51 of these sensory and motor regions showed post-HDBR+CO<sub>2</sub> FC changes that were significantly  
52 associated with alterations in sensorimotor performance. We propose that these FC changes  
53 reflect multisensory reweighting associated with adaptation to the HDBR+CO<sub>2</sub> microgravity  
54 analog environment. This knowledge will further improve HDBR as a model of microgravity  
55 exposure and contribute to our knowledge of brain and performance changes during and after  
56 spaceflight.

57

58

59

60

61

62

63 This study was supported by NASA grant #80NSSC17K0021. HRM was supported by a NSERC  
64 postdoctoral fellowship and a NASA Human Research Program grant augmentation.

65 MRI files for this study will be placed in the NASA data repository upon study completion.

66

## 67 INTRODUCTION

68 Spaceflight elicits sensorimotor adaptive processes due to altered sensory inputs. Upon initial  
69 exposure to microgravity, crewmembers typically experience sensorimotor disturbances and  
70 disorientation, but they gradually adapt to body unloading, alterations in vestibular, and  
71 somatosensory inputs (Paloski et al., 1994, 1992; Reschke et al., 1998), as well as to headward  
72 fluid shifts (Lee et al., 2019; Roberts et al., 2017). In addition to microgravity, astronauts must  
73 also adapt to the mildly hypercapnic environment of the International Space Station (ISS) where  
74 carbon dioxide (CO<sub>2</sub>) levels average 0.5% -- approximately ten times higher than typical ambient  
75 levels (~0.04%) on Earth (Law et al., 2014). On Earth, exposure to 3% CO<sub>2</sub> over several hours  
76 produces headaches while resting. During mild exertion, subjects begin to report headaches at  
77 2% CO<sub>2</sub> (Schlute, 1964). Mild impairments in visuo-motor performance have been reported at  
78 levels as low as 1.2% CO<sub>2</sub> (Manzey and Lorenz, 1998). Onboard the ISS, astronauts report CO<sub>2</sub>-  
79 related symptoms at lower CO<sub>2</sub> levels than would be expected on Earth; astronauts are more  
80 prone to headaches (Law et al., 2014) and experience “space fog” characterized by slowed  
81 mental abilities and poor concentration (Kanas and Manzey, 2008; Welch et al., 2009). This  
82 suggests that microgravity and elevated CO<sub>2</sub> levels may interact to negatively impact  
83 crewmember health and mission success.

84  
85 Astronauts return to Earth in a microgravity-adapted state, exhibiting pronounced impairments in  
86 balance (Cohen et al., 2012; Paloski et al., 1994), locomotion (Bloomberg and Mulavara, 2003;  
87 Courtine and Pozzo, 2004; McDonald et al., 1996; Mulavara et al., 2018, 2010), and manual  
88 motor control (Manzey et al., 2000; Moore et al., 2019). Readaptation to Earth’s 1g environment  
89 takes place over the course of days or weeks (Miller et al., 2010; Mulavara et al., 2018, 2010).

90  
91 Although the behavioral effects of spaceflight have been well-documented, the neural  
92 mechanisms underlying these changes remain largely unknown. We know even less about how  
93 exposure to microgravity and chronically elevated CO<sub>2</sub> levels combine to affect the brain,  
94 cognition, and sensorimotor performance. Here, we investigated this issue using a well-  
95 established spaceflight analog, ‘head-down tilt bed rest’ (HDBR), combined with elevated levels  
96 of CO<sub>2</sub> to better simulate environmental conditions (i.e., microgravity and mild hypercapnia)  
97 experienced during spaceflight onboard the ISS.

98

99 HDBR studies have become the predominant model for simulating microgravity on Earth, and  
100 studying its effects on the human body (Hargens and Vico, 2016; Pavy-Le Traon et al., 2007). In  
101 an HDBR study, healthy participants continuously lay in bed with their head tilted below the  
102 level of the feet. HDBR mimics some of the effects of microgravity exposure including axial  
103 body unloading, reduced somatosensory inputs (Reschke et al., 2009), deconditioning (Hargens  
104 and Vico, 2016), headward fluid shifts and upward shift of the brain within the skull  
105 (Koppelmans et al., 2017b), sensorimotor behavioral dysfunction (Koppelmans et al., 2017a;  
106 Reschke et al., 2009), and changes in brain activity (Cassady et al., 2016; Liao et al., 2015, 2012;  
107 Yuan et al., 2018a, 2018b, 2016; Zhou et al., 2014). In contrast to previous bed rest studies, here  
108 we used “strict” HDBR. To keep the head tilted down at a 6° angle, subjects were not permitted  
109 to use a standard pillow.

110

111 In the current study, we used resting-state functional magnetic resonance imaging (rsfMRI) to  
112 assess how HDBR+CO<sub>2</sub> affects the brain’s large-scale functional network architecture. The brain  
113 has the highest metabolic activity of any organ in the human body, and the majority of its energy  
114 is consumed while in a state of wakeful rest (Lord et al., 2013; Raichle, 2010a, 2010b). While at  
115 rest, several networks of distributed brain regions exhibit spontaneous, low frequency BOLD  
116 signal fluctuations. Resting-state fMRI is a method used to estimate correlations within these  
117 resting-state networks. Resting-state network topographies closely correspond to structural  
118 connectivity and therefore correlations within these networks are thought to reflect functional  
119 connectivity (FC) (Biswal et al., 1995; Fox et al., 2005).

120

121 Demertzi and colleagues (2016) investigated resting-state FC changes in a single cosmonaut  
122 following a 169-day mission on the ISS. They reported reduced intrinsic connectivity within the  
123 right insula and ventral posterior cingulate cortex as well as reduced FC between the cerebellum  
124 and motor cortex relative to pre-flight measures (Demertzi et al., 2016). HDBR studies  
125 simulating microgravity with larger sample sizes have examined how simulated microgravity in  
126 ambient air have reported resting-state functional connectivity increases involving somatomotor  
127 and vestibular cortices, the cerebellum, insular and cingulate cortices, parietal regions, and the  
128 thalamus (Cassady et al., 2016; Liao et al., 2015, 2013, 2012; Zeng et al., 2016; Zhou et al.,

129 2014). Connectivity increases may reflect increases in sensory weighting in microgravity or  
130 during HDBR, whereas connectivity decreases may be associated with reductions in use or  
131 reduced sensory weighting.

132  
133 We have previously conducted a 70-day HDBR study in ambient air using a similar design, and  
134 an identical battery of sensorimotor and cognitive assessments to those employed here  
135 (Koppelmans et al., 2015). In our previous work, we have examined resting-state FC changes  
136 during HDBR in ambient air, and their associations with performance changes on identical  
137 behavioral assessments (Cassady et al, 2016). Methodology of the previous ambient air HDBR  
138 study differs with respect to the current HDBR+CO<sub>2</sub> study. First, the ambient air HDBR study  
139 did not employ strict bed rest; subjects were permitted to use a standard pillow (which altered the  
140 degree of head tilt) and subjects were permitted to raise their head while eating. Second, under  
141 NASA's directions, the previous ambient air HDBR study employed a different bed rest phase  
142 duration and a different testing timeline (Cassady et al, 2016). In the current study, we used  
143 similar analyses and identical regions of interests as Cassady et al (2016) to aid in drawing  
144 parallels between our results.

145  
146 Lee et al (2019) contrasted the behavioral effects of HDBR+CO<sub>2</sub> compared to our previous  
147 ambient air HDBR study. In light of the differing bed rest phase durations, comparisons relied on  
148 the rates (slopes) of performance change over time. Lee et al. (2019) reported differential pre- to  
149 post-bed rest performance changes on three assessments: 1) response variability on a rod and  
150 frame test, 2) time to complete a digit symbol substitution test, and 3) time to complete the  
151 Functional Mobility Test. Here, since we were interested in the additive effects of elevated CO<sub>2</sub>,  
152 we examined brain-behavioral associations for those behavioral measures that showed  
153 significantly different changes following HDBR+CO<sub>2</sub> compared to HDBR in ambient air. As  
154 published by Lee et al (2019), the HDBR+CO<sub>2</sub> group's performance on the digit symbol  
155 substitution task followed a learning curve throughout the study, providing clear evidence of  
156 practice effects but no discernable effect of the bed rest intervention. For this reason, we have  
157 omitted data from the digit symbol substitution test from our brain-behavioral analyses.

158  
159

160 The aim of the current study was to investigate brain and behavioral effects of prolonged  
161 exposure to simulated microgravity and elevated CO<sub>2</sub> levels as a model of long-duration  
162 spaceflight onboard the International Space Station. Eleven subjects underwent 30 days of 6°  
163 HDBR in 0.5% CO<sub>2</sub>. Cognitive and sensorimotor tests were administered before, during, and  
164 after the HDBR+CO<sub>2</sub> intervention. Using both hypothesis-driven and hypothesis-free  
165 approaches, we examined: 1) time courses of resting-state FC changes from pre-, during-, to  
166 post-HDBR+CO<sub>2</sub>, and 2) relationships between FC changes and behavioral changes associated  
167 with HDBR+CO<sub>2</sub>. In light of previous work, we hypothesized that our 30-day HDBR+CO<sub>2</sub>  
168 intervention would alter resting-state FC involving sensorimotor brain areas, regions involved in  
169 multisensory integration, and brain areas within the default mode network (Cassady et al., 2016;  
170 Demertzi et al., 2016; Koppelmans et al., 2017a; Liao et al., 2015, 2012; Zhou et al., 2014). We  
171 also investigated FC changes involving visual brain areas as elevated CO<sub>2</sub> levels are  
172 hypothesized to contribute to the development of ophthalmic abnormalities and visual  
173 impairments in astronauts following long-duration spaceflight (Zwart et al., 2017). To determine  
174 the specificity of our findings, we conducted follow-up tests in which we compared the patterns  
175 of FC changes observed in the HDBR+CO<sub>2</sub> group to those of a HDBR control group, which  
176 underwent strict HDBR in standard ambient air.

177

## 178 **METHODS**

179

### 180 **Participants**

181

182 All data were collected at :envihab, the German Aerospace Center's medical research facility in  
183 Cologne, Germany. Prior to enrolment, all subjects passed psychological screening and an Air  
184 Force Class III equivalent physical examination. Subjects received monetary compensation for  
185 their participation. Study protocols were approved by the ethics commission of the local medical  
186 association (Ärzttekammer Nordrhein) and institutional review boards at NASA, The University  
187 of Florida (HDBR+CO<sub>2</sub> and HDBR control). All subjects provided written informed consent at  
188 :envihab.

189

### 190 HDBR+CO<sub>2</sub> group

191 Twelve participants originally enrolled in the HDBR+CO<sub>2</sub> study. One participant withdrew from  
192 the study on the first day of bed rest. Eleven participants completed the HDBR+CO<sub>2</sub> study (6  
193 males, 5 females; 25.3-50.3 years of age at study enrolment).

194

#### 195 HDBR control group

196 Eight participants were included in a HDBR control group (6 males, 2 females; 27-46 years of  
197 age at study enrolment). Data from the HDBR control data were collected as part of a subsequent  
198 study which employed a 60-day bed rest phase. HDBR control data were also collected at  
199 :envihab approximately one year following data collection for the HDBR+CO<sub>2</sub> group.

200

201

### 202 **Experimental Design**

203

204 This experiment was part of the VaPER (Vision Impairment and Intracranial Pressure and  
205 Psychological :envihab Research) bed rest campaign. Subjects resided at :envihab for 58  
206 consecutive days, during which they participated in several experiments. Our experiment  
207 consisted of 3 phases: a 14-day baseline data collection (BDC) phase, 30 days of strict 6° head-  
208 down tilt bed rest phase with elevated CO<sub>2</sub> (HDBR+CO<sub>2</sub>), followed by a 14-day recovery (R)  
209 phase (see Figure 1).

210

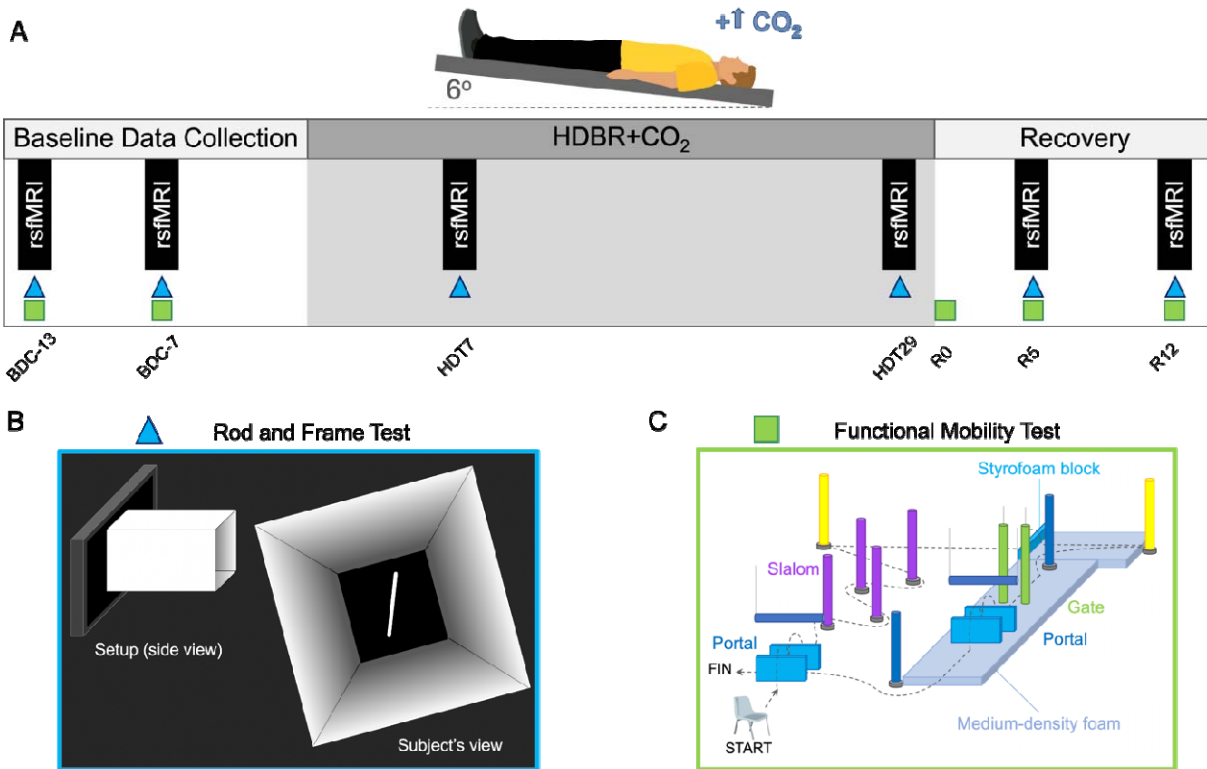

211  
 212 **Figure 1. A)** Subjects underwent a 15-day baseline data collection (BDC), 30 days of 6° head-  
 213 down tilt bed rest with elevated carbon dioxide (HDBR+CO<sub>2</sub>), followed by a 14-day recovery  
 214 (R) phase. Resting-state fMRI scans occurred: 13 and 7 days before bed rest, on days 7 and 29 of  
 215 the bed rest phase, and on the 6<sup>th</sup> day (R5) and 13<sup>th</sup> day (R12) during the recovery phase. **B)**  
 216 Subjects performed a rod and frame test after each scan session. **C)** The Functional Mobility  
 217 Test, an obstacle course, was administered twice during the baseline phase and three times  
 218 following bed rest: on recovery days R0 (3 hours after first standing), R5, and R12.

219

220

### 221 *Baseline Data Collection (BDC)*

222 Subjects were admitted 15 days prior to bed rest for baseline data collection in standard ambient  
 223 air (~0.04% CO<sub>2</sub>). Subjects were ambulatory during the baseline phase, but were not permitted to  
 224 leave the :envihab facility. Other than participating in study assessments, the subjects were not  
 225 limited in their activities. Subjects slept in a horizontal (i.e., 0° tilt) position. For both groups,  
 226 baseline resting-state fMRI scans and behavioral assessments (described below) occurred 13 and  
 227 7 days prior to bed rest (BDC-13 and BDC-7, respectively). Behavioral tests were performed  
 228 approximately 3 hours after neuroimaging sessions. Baseline behavioral assessments (except



229 those requiring upright stance or locomotion) were performed while subjects laid in a 6° HDT  
230 position.

231

### 232 *Head-down Tilt Bed Rest*

233 All subjects remained in the HDT position 24 hours a day. They were instructed to have at least  
234 one shoulder in contact with the mattress at all times, and were not permitted to raise their head  
235 or prop themselves up. To keep the head tilted down at a 6° angle, subjects were not permitted to  
236 use a traditional pillow. Subjects were permitted to use a 5 cm tall support for the head and neck  
237 only when laying on their side (Laurie et al., 2019; 2020). No pillows were used when subjects  
238 laid on their back. Subjects were also not permitted to raise, contract or stretch their legs during  
239 the bed rest phase.

240

### 241 HDBR+CO<sub>2</sub> group

242 Subjects in the HDBR+CO<sub>2</sub> group underwent 30 consecutive days of strict 6° HDBR in elevated  
243 CO<sub>2</sub> (0.5%; 3.8 mmHg partial pressure of CO<sub>2</sub>). Resting-state fMRI scans and behavioral  
244 assessments occurred on days 5 and 29 of the HDBR+CO<sub>2</sub> phase (HDT5 and HDT29,  
245 respectively). Behavioral assessments were conducted at the bedside approximately 3 hours after  
246 neuroimaging sessions while the subject was in the HDT position. The Functional Mobility Test,  
247 which required upright stance and locomotion, was not performed during the HDBR+CO<sub>2</sub> phase.

248

### 249 HDBR control group

250 Subjects in the HDBR control group underwent 60 consecutive days of strict 6° HDBR in  
251 standard ambient air. Resting-state fMRI scans occurred on days 29 (HDT29) and 58 of the bed  
252 rest phase. Here we analyzed HDBR control group resting-state fMRI data for the HDT29  
253 session only since both underwent a HDT29 scan session.

254

### 255 *Recovery (R)*

256 Following bed rest, all subjects underwent a 14-day recovery (i.e., day R0 to day R13) phase in  
257 standard ambient air (~0.04% CO<sub>2</sub>). Subjects were ambulatory, were not restricted in their  
258 activities, and slept in a horizontal (i.e., 0° tilt) position. Each subject received 1-hour  
259 rehabilitation sessions on days 3, 5, 7, 8, 9, and 11 of the recovery phase. Rehabilitation sessions

260 involved active stretching and exercise regimens using a Bosu<sup>®</sup> ball or coordination ladder to  
261 improve strength and coordination. For the HDBR+CO<sub>2</sub> group, resting-state fMRI scans were  
262 acquired on R5 and R12. The the rod and frame test were performed after scan sessions on R5  
263 and R12 while subjects laid in 6° HDT position. The Functional Mobility Test was performed 3  
264 times during the recovery phase: on days R0 (approximately 3 hours after first standing after bed  
265 rest), R5, and R12. The group differences in bed rest duration preclude direct comparisons  
266 between the two groups during the recovery phase. We therefore omitted recovery phase resting-  
267 state fMRI data for the HDBR control group.

268

269 As part of NASA's standard measures assessments, blood draws were acquired 3 days prior to bed rest  
270 and on the first day after bed rest to calculate arterial partial pressure of carbon dioxide (PaCO<sub>2</sub>). We  
271 predicted that PaCO<sub>2</sub> would increase from pre-to-post HDBR+CO<sub>2</sub>. Changes in PaCO<sub>2</sub> were  
272 assessed using a one-tailed paired samples t-test.

273

## 274 **Behavioral Assessments**

275

### 276 *Rod & Frame Test*

277 The rod and frame test assesses the extent to which subjects rely on a visual frame of reference  
278 for their perception of true vertical. As shown in Figure 1 (lower left), a 60-cm-long white  
279 tunnel-like frame was affixed to a flat screen computer monitor. A white rod was displayed on  
280 the screen inside the square frame. Subjects laid on their side at the edge of the bed and the end  
281 of the frame was positioned around their face to occlude any visual cues from the surrounding  
282 room. Subjects were then presented with random tilts of the rod and  $\pm 18^\circ$  frame tilts for each  
283 trial, and they used a handheld controller to align the rod to Earth vertical (i.e., 0° tilt). Each  
284 response was scored based on the deviation, in degrees, between perceived and true vertical. The  
285 primary outcome presented here is response consistency which refers to the within-subject  
286 variability of scores for a given rod/frame tilt combination. Since higher values reflect greater  
287 variability, here we refer to this measure as response variability.

288

### 289 *Functional Mobility Test*

290 Subjects' locomotor function was assessed using the Functional Mobility Test (Figure 1, lower  
291 right). This test requires subjects to navigate an obstacle course by performing whole-body  
292 movements similar to those required to exit a vehicle after long-duration spaceflight (Mulavara  
293 et al., 2010; Koppelmans et al. 2013). The first half of the Functional Mobility Test was built on  
294 a hard surface while the second half was built on a medium-density foam floor. The foam base  
295 was used to reduce the reliability of proprioceptive input (Mulavara et al., 2010) and increase  
296 reliance on vestibular cues (Jeka et al., 2004). This course was comprised of 1) foam pylons  
297 arranged in a slalom pattern, requiring quick changes in heading direction, 2) "portals"  
298 consisting of a horizontally-hung foam obstacle between 2 styrofoam blocks which required  
299 subjects to bend at the waist and balance on one foot while stepping over the Styrofoam blocks,  
300 3) a Styrofoam block located at the transition point between the hard floor and foam base,  
301 requiring subjects to balance on one foot on the unstable foam while clearing the Styrofoam  
302 block, and 4) a "gate" consisting of 2 vertically-hung pylons through which subjects entered  
303 sideways (i.e., shoulder first). Subjects started in a seated position. They were instructed to walk  
304 quickly and safely through the course without touching any obstacles. Here we present the time  
305 to complete the first of 10 trials as this measure is most sensitive to mobility changes.

306 Since the aim of the current study was to investigate brain and behavioral effects of our  
307 HDBR+CO<sub>2</sub> intervention, we examined behavioral changes from immediately pre- to post-  
308 HDBR+CO<sub>2</sub>, as this is where the behavioral changes are most evident.

### 309 **MRI Image Acquisition**

310 During all MRI scan sessions, a foam wedge was used to maintain the subject's body in the 6°  
311 HDT position, but the head was horizontal in the MRI coil. For subjects in the HDBR+CO<sub>2</sub>  
312 group only, a mask and tank system was used to maintain the 0.5% CO<sub>2</sub> level throughout scan  
313 sessions during the bed rest phase.

314 All neuroimaging data were acquired on a 3-Tesla Siemens Biograph mMR scanner. T1-  
315 weighted anatomical images were collected using a MPRAGE sequence with the following  
316 parameters: TR = 1900 ms, TE = 2.44 ms, flip angle = 9°, FOV = 250 x 250 mm, matrix = 512 x  
317 512, voxel size = 0.5 x 0.5 mm, 192 sagittal slices, slice thickness = 1 mm, slice gap = 0.5 mm.  
318 Whole-brain functional data were acquired using a T2\*-weighted EPI sequence with the

319 following parameters: TR = 2500 ms, TE = 32 ms, flip angle = 90°, FOV = 192 x 192 mm,  
320 matrix = 64 x 64, voxel size = 3 x 3 x 3.5 mm, slice thickness = 3.5mm, 37 axial slices, duration  
321 = 7 minutes. During the resting-state scan, participants were instructed to remain awake with  
322 their eyes open, fixate a red circle, and not think about anything in particular.

323

## 324 **Image Preprocessing**

325

326 Neuroimaging data analyses were performed using the Statistical Parametric Mapping 12  
327 software (SPM12; [www.fil.ion.ucl.ac.uk/spm](http://www.fil.ion.ucl.ac.uk/spm)) and the CONN toolbox version 18a (Whitfield-  
328 Gabrieli and Nieto-Castanon, 2012) implemented in Matlab 2018b. Image preprocessing was  
329 identical for the HDBR+CO<sub>2</sub> group and HDBR control group. Functional image preprocessing  
330 included spatial alignment to the first volume, slice timing correction, coregistration, and  
331 normalization with resampling to 2 mm isotropic voxels. Structural images were segmented into  
332 gray matter, white matter, and cerebrospinal fluid (CSF) tissue maps, and normalized to  
333 Montreal Neurological Institute (MNI) standard space.

334

335 To improve cerebellar normalization, we used CERES to segment the cerebellum from each  
336 subject's anatomical image (Romero et al., 2017). CERES is an automated pipeline that uses a  
337 segmentation method called Optimized PatchMatch Label fusion (for details see Romero et al.,  
338 2017). CERES has been shown to yield more accurate cerebellar segmentations compared to  
339 other tools including the SUI toolbox (Carass et al., 2018). CERES was used to segment the  
340 cerebellum from each native space anatomical scan. Generated cerebellar masks were used to  
341 extract the cerebellum from each subject's session-wise T1 and coregistered functional images.  
342 The cerebellums extracted from functional and structural images were then normalized to the  
343 SUI space template. The SUI template was used because it retains more anatomical detail  
344 within the cerebellum compared to whole brain MNI templates, resulting in improved  
345 normalization for functional MRI (Diedrichsen, 2006).

346

347 Whole-brain functional images were spatially smoothed using a 5 mm full width at half  
348 maximum (FWHM) Gaussian kernel. The cerebellums extracted from functional scans were

349 spatially smoothed using a 2 mm FWHM Gaussian kernel. A smaller smoothing kernel was used  
350 for the cerebellums so as to reduce smoothing across lobules and tissue types.

351

## 352 **Image Denoising**

353 Since measures of resting-state FC are known to be influenced by head motion (Van Dijk et al.,  
354 2012), we used the ARTifact detection tool (ART; [http://www.nitrc.org/projects/artifact\\_detect](http://www.nitrc.org/projects/artifact_detect))  
355 to detect and reject motion artifacts. Within each resting-state run, a volume was deemed an  
356 outlier if the subject's composite movement exceeded 0.9 mm or if the global mean intensity of  
357 the volume exceeded 5 standard deviations from the mean image intensity of the run. This  
358 corresponds to the intermediate default motion thresholds in the CONN toolbox (Whitfield-  
359 Gabrieli and Nieto-Castanon, 2012). ART generated a “scrubbing” regressor which identified  
360 outlier volumes. For the HDBR+CO<sub>2</sub> group, the following number of volumes ( $\pm$  SD, range)  
361 were detected as outliers at each of the time points: BDC-13:  $2.4 \pm 3.3$  SD, range=0-9; BDC-7:  
362  $1.5 \pm 1.8$  SD, range=0-4; HDT7:  $0.36 \pm 1.2$  SD, range=0-4; HDT29: 0 outlier volumes; R5:  $0.55$   
363  $\pm 1.8$  SD, range=0-6; R12:  $0.63 \pm 1.3$  SD, range=0-4. As 164 volumes were acquired during each  
364 resting-state run, less than 6% of the original data points (i.e., 9/164 volumes) were identified as  
365 outliers and regressed out across subjects and sessions. A repeated measures ANOVA followed  
366 by Bonferroni post-hoc tests revealed no statistically significant main effect of session on the  
367 number of outlier volumes [Wilks'  $F(5,6)=1.426$ ,  $p=0.336$ ] for the HDBR+CO<sub>2</sub> group. Including  
368 subject-wise regressors modelling the number of outlier volumes for each resting-state fMRI run  
369 resulted in qualitatively similar results. Similarly, for the HDBR control group, a repeated  
370 measures ANOVA followed by Bonferroni post-hoc tests revealed no significant main effect of  
371 session on the number of outlier volumes [Wilks'  $F(2,6)=0.741$ ,  $p=0.516$ ].

372

373 Resting-state fMRI data are also influenced by noise arising from physiological fluctuations,  
374 primarily cardiac pulsations and respiration, which can exhibit spatial and spectral overlap with  
375 resting-state networks (Cole et al., 2010). We used the anatomical component-based noise  
376 correction (aCompCor) method to denoise our data (Behzadi et al., 2007). This method uses a  
377 principal components analysis approach to estimate noise signals in the white matter and CSF.  
378 For each session, the participant's anatomical image was segmented into white matter and CSF  
379 masks. Resulting masks were eroded by one voxel to reduce partial volume effects, and were

380 then applied to unsmoothed resting-state functional images. Unsmoothed functional images were  
381 used to avoid smoothing the BOLD signal across neighboring brain areas and different tissue  
382 types. BOLD signals were then extracted from the white matter and CSF used as noise regions of  
383 interest (ROIs) in a principal components analysis. The resulting significant components  
384 modelled the influence of noise as a voxel-wise linear combination of multiple estimated  
385 sources. For each run, 5 principal components were extracted for each of the white matter and  
386 CSF noise ROIs, and were included as nuisance regressors in our first-level GLM.

387

388 Each preprocessed resting-state run was denoised by regressing out confounding effects of head  
389 motion (6 head motion parameters and their 6 first-order temporal derivatives), 5 principal  
390 components modelling estimated noise from the white matter, 5 principal components modelling  
391 estimated noise from the CSF, and a “scrubbing” regressor modelling outlier volumes within the  
392 run. The resulting residuals were band-pass filtered between 0.008–0.09 Hz (Biswal et al., 1995;  
393 Damoiseaux et al., 2006) prior to being used in subject-level analyses.

394

## 395 **Subject-level analyses**

396

397 We used two approaches to examine connectivity changes associated with HDBR+CO<sub>2</sub>: a  
398 hypothesis-based seed-to-voxel analysis and a hypothesis-free voxel-to-voxel analysis.

399

### 400 *Seed-to-voxel analysis*

401 For our seed-to-voxel analyses, we selected 13 *a priori* seed regions of interest (ROIs). We  
402 hypothesized that our HDBR+CO<sub>2</sub> intervention would induce functional changes involving  
403 sensorimotor brain areas, regions involved in multisensory integration, and brain areas within the  
404 default mode network (Cassady et al., 2016; Demertzi et al., 2016; Koppelmans et al., 2017a;  
405 Liao et al., 2015, 2012; Zhou et al., 2014; Zeng et al., 2016). We used the same ROI coordinates  
406 as used in our previous resting-state fMRI study using an ambient air HDBR intervention  
407 (Cassady et al., 2016). Elevated CO<sub>2</sub> levels are hypothesized to be one of the environmental  
408 factors contributing to the development of ophthalmic abnormalities and visual impairments in  
409 astronauts following long-duration spaceflight (Zwart et al., 2017). Therefore, we also included  
410 ROIs located within primary visual cortex and frontal eye field, the coordinates of which were

411 determined using the automatic anatomic labeling (AAL) atlas included in the CONN toolbox.  
412 Table 1 shows coordinates for ROIs used in our seed-to-voxel analyses.

413

| Regions of Interest (ROIs)         | MNI Coordinates |     |     |
|------------------------------------|-----------------|-----|-----|
|                                    | x               | y   | z   |
| R premotor cortex (PMC)            | 26              | -10 | 55  |
| R middle frontal gyrus (MFG)       | 30              | -1  | 43  |
| L primary motor cortex (M1)        | -38             | -26 | 50  |
| L putamen                          | -28             | 2   | 4   |
| L insular cortex                   | -41             | 12  | -9  |
| R vestibular cortex                | 42              | -24 | 18  |
| L frontal eye field (FEF)          | -27             | -9  | 64  |
| L posterior cingulate cortex (PCC) | -12             | -47 | 32  |
| R posterior parietal cortex (PPC)  | 28              | -72 | 40  |
| R superior posterior fissure       | 24              | -81 | -36 |
| L primary visual cortex (V1)       | -10             | -70 | 10  |
| R cerebellar lobule V              | 16              | -52 | -22 |
| R cerebellar lobule VIII           | 20              | -57 | -53 |

414

415 **Table 1.** Regions of interest (ROIs) and their coordinates used for seed-to-voxel analyses. L, left;  
416 R, right.

417

418 ROIs included all voxels within a 4-mm-radius sphere centered on the ROI coordinates. We first  
419 extracted the time series from unsmoothed functional data within each ROI. For ROIs located in  
420 the cerebrum, ROI time series were drawn from the whole brain unsmoothed functional images  
421 (source image). For ROIs located in the cerebellum, ROI time series were drawn from the  
422 unsmoothed cerebellums extracted from functional images (source image). We then computed  
423 the spatial average of the BOLD time series across all voxels with the ROI.

424

425 We estimated FC between each ROI and the rest of the brain or within the cerebellum. For each  
426 ROI, we computed (bivariate) Pearson's correlation coefficients between the mean ROI time  
427 series and the time series of every other voxel in the smoothed whole brain functional and within

428 the cerebellum (i.e., smoothed cerebellums extracted from functional scans). Correlation  
429 coefficients were then Fisher Z-transformed to improve their normality. This procedure was  
430 performed for each of the subjects' six resting-state scans separately.

431

#### 432 *Voxel-to-voxel analyses*

433 We also used hypothesis-free voxel-to-voxel analyses. This allowed us to identify connectivity  
434 changes without restricting our analyses to our *a priori* selected ROIs. Here we examined  
435 changes in Intrinsic Connectivity Contrast (ICC), a measure which utilizes graph theory metrics  
436 to estimate global connectivity pattern strength (Martuzzi et al., 2011). This analysis involved  
437 computing (bivariate) Pearson's correlation coefficients between the time course of each voxel  
438 with the time series of every other voxel in the brain (or within the cerebellum). The root mean  
439 square of each correlation was then computed. Correlation coefficients were then Fisher Z-  
440 transformed to improve their normality. This yielded one ICC map per run, each reflecting the  
441 connectivity strength (i.e., magnitude) at each voxel.

442

### 443 **Group-level Functional Connectivity Analyses**

#### 444 *Time Course of Functional Connectivity Changes with HDBR+CO<sub>2</sub>*

445 In this study, we were interested in the brain's gradual adaptation to prolonged simulated  
446 microgravity and chronic CO<sub>2</sub> elevation as opposed to the acute effects of elevated CO<sub>2</sub>  
447 exposure. For both our seed-to-voxel and voxel-to-voxel analyses, we used the longitudinal  
448 model shown in Figure 2 to assess the time course of FC changes from pre-, during-, to post-bed  
449 rest. Our aim was to identify those brain regions that exhibited stable FC across the 2 baseline  
450 time points, then showed a gradual change in FC during HDBR+CO<sub>2</sub>, followed by a gradual  
451 return to baseline over the 2 post-bed rest time points. In this way, subjects served as their own  
452 controls.

453

454 The HDBR+CO<sub>2</sub> group and HDBR control group differed in bed rest duration (30 vs. 60 days)  
455 and data collection timeline (6 vs 5 sessions). This precluded direct comparison of the groups in  
456 our GLM. In light of this, we performed GLM analyses on the HDBR+CO<sub>2</sub> group data only.  
457 Based on the results of these analyses, we performed follow-up assessments using resting-state  
458 fMRI data from the HDBR control group (detailed below).



459

460 For these analyses, our hypothesized model weights as a within-subjects contrast in our general  
461 linear model (GLM). The between-subjects regressor of interest was the grand mean. Age and  
462 sex were included as between-subjects covariates of no interest. Our analysis is analogous to that  
463 used by Cassady et al (2016). An uncorrected voxel threshold of  $p < 0.001$  was set, and results  
464 were considered statistically significant at a cluster-level threshold of  $p < 0.05$  (two-tailed),  
465 corrected for multiple comparisons according to the false discovery rate (FDR) method.

466

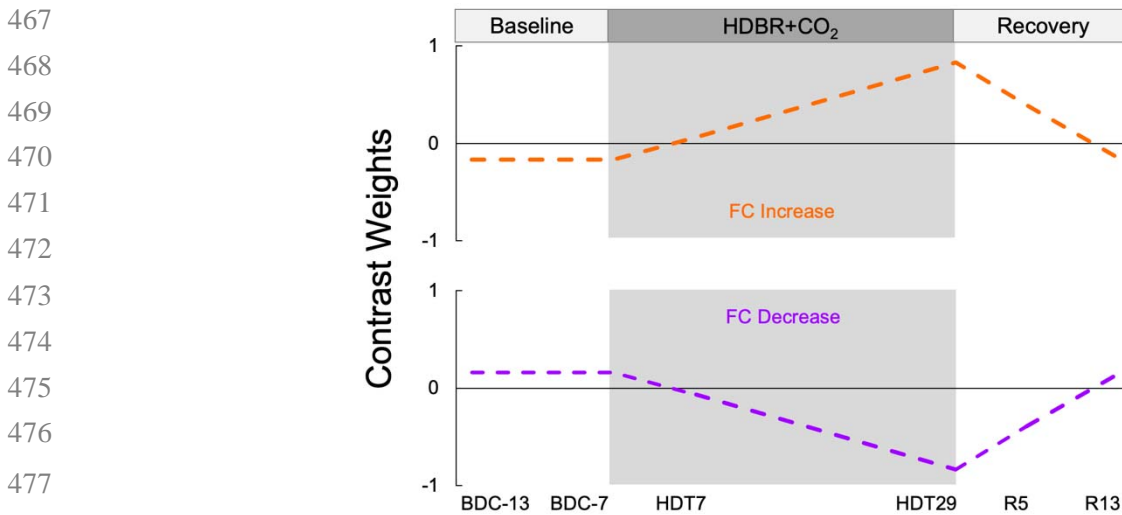

478

479 **Figure 2. Contrast models used to assess time course of FC changes of the HDBR+CO<sub>2</sub>**  
480 **group.** Contrast weights used in the HDBR+CO<sub>2</sub> group analyses. The gray shaded region  
481 indicates the HDBR+CO<sub>2</sub> phase. The contrast in orange models a gradual FC increase during bed  
482 rest followed by a gradual FC decrease back to baseline level following bed rest. The contrast in  
483 purple models a gradual FC decrease during bed rest followed by a gradual FC increase back to  
484 baseline level following bed rest. BDC, baseline data collection; HDBR+CO<sub>2</sub>, head-down tilt  
485 bed rest with elevated carbon dioxide; R, recovery.

486

#### 487 *Time Course of Functional Connectivity Changes for HDBR control group*

488 We performed follow-up assessments using the resting-state fMRI data from the HDBR control  
489 group. This was done to examine if the FC changes identified by our HDBR+CO<sub>2</sub> longitudinal  
490 analyses were due to undergoing strict HDBR alone or due to the combination of strict bed rest  
491 and elevated CO<sub>2</sub>. We used HDBR control group resting state data from BDC-13, BDC-7, and

492 HDT29 sessions as the both groups underwent scans on these days. For each significant cluster  
493 identified by our HDBR+CO<sub>2</sub> longitudinal analysis, we generated a binary mask of the cluster.  
494 The cluster mask was used to extract FC or ICC values for each subject in the HDBR control  
495 group for sessions BDC-13, BDC-7, and HDT29. If a cluster resulted from a seed-to-voxel  
496 analysis, we extracted average FC values between the ROI and all voxels within the cluster  
497 mask. If a cluster resulted from a voxel-to-voxel analysis, we extracted average ICC values  
498 across all voxels within the cluster mask.

499  
500 We then performed a split-plot ANOVA using IBM® SPSS® Statistics 21 to compare the time  
501 course of connectivity changes across BDC-13, BDC-7 and HDT29 between the HDBR+CO<sub>2</sub>  
502 group and the HDBR control group. If the connectivity changes observed in the HDBR+CO<sub>2</sub>  
503 group from BDC-13 to HDT29 are indeed due to the combination of strict HDBR and elevated  
504 CO<sub>2</sub>, it follows that the time courses of connectivity changes will differ between the two groups  
505 (i.e., a significant group x session interaction). However, if the connectivity changes observed in  
506 the HDBR+CO<sub>2</sub> do not differ from those of the HDBR control group, then this would suggest  
507 that the connectivity change was a result of undergoing strict HDBR.

508

### 509 *Behavioral Analyses*

510 We have recently examined cognitive and motor performance alterations following 6°  
511 HDBR+CO<sub>2</sub> compared to 6° HDBR with ambient air (Lee et al., 2019). These two bed rest  
512 studies employed an identical battery of behavioral tests (Koppelmans et al., 2015). Since we  
513 were interested in the additive effects of elevated CO<sub>2</sub>, here we examined only those behavioral  
514 measures that showed significantly different changes following HDBR+CO<sub>2</sub> compared to  
515 ambient air HDBR. Differential performance changes were found for the following behavioral  
516 measures: i) response variability on the rod and frame test (referred to as response consistency in  
517 previous work), and ii) time to complete the full Functional Mobility Test.

518

519 Here we tested if pre- to post-HDBR+CO<sub>2</sub> FC changes were associated with behavioral changes  
520 (i.e., a change-change correlation). For each of the behavioral measures above, we computed  
521 each subject's change in behavior from the last baseline time point (BDC-7) to the end of bed  
522 rest (HDT29; R0 for the Functional Mobility Test only).

523

### 524 *Associations Between Functional Connectivity and Behavior Changes*

525 We then performed group-level GLM analyses to test if pre- to post-HDBR+CO<sub>2</sub> FC changes  
526 were associated with behavioral changes. Here we examined FC from 7 days before bed rest  
527 (BDC-7) to day 29 of bed rest (HDT29). A separate analysis was performed for each behavioral  
528 test. For these analyses, we calculated the change in each subject's performance from before bed  
529 rest to the end of bed rest. The regressor of interest for our between-subjects contrast modeled  
530 the performance changes across subjects. Subject age, sex, and the grand mean were included as  
531 covariates of no interest. Our within-subjects contrast modeled the change in FC from pre- to  
532 post-bed rest. These analyses allowed us to examine those areas of the brain in which FC  
533 changes following HDBR+CO<sub>2</sub> were significantly associated with performance changes. An  
534 uncorrected voxel threshold was set at  $p < 0.001$ , and results were thresholded at a FDR-  
535 corrected significance level of  $p < 0.05$  (two-tailed, cluster-wise).

536

537 In total, 56 tests were conducted using GLMs (13 seed-to-voxel and 1 voxel-to-voxel analyses  
538 conducted for the time course analysis and each of the 3 brain-behavior associations). We used  
539 the Benjamini-Hochberg procedure to control the false discovery rate at 0.05 (Benjamini and  
540 Hochberg, 1995). Cluster-level uncorrected  $p$  value obtained by each GLM analysis were  
541 submitted to Benjamini and Hochberg's FDR procedure with  $\alpha_{FDR} = 0.05$  (Chumbley et al.,  
542 2010). A cluster was considered statistically significant if its uncorrected cluster size  $p < 0.00089$   
543 (i.e.,  $(1/56) \times 0.05$ ).

544

545

546

## 547 **RESULTS**

548

549 A paired samples t-test revealed a small but significant increase in PaCO<sub>2</sub> from pre- (41.4  
550 mmHg) to post- (43.4 mmHg) HDBR+CO<sub>2</sub> ( $t(10)=2.16$ ,  $p=0.028$ , one-tailed).

551

### 552 **Time Course of Functional Connectivity Changes with HDBR+CO<sub>2</sub>**

553 *Seed-to-voxel analyses*

554 Seed-to-voxel analyses revealed that right vestibular cortex exhibited increases in FC with right  
555 cerebellar crus I and II during HDBR+CO<sub>2</sub>, followed by a reduction in connectivity following  
556 bed rest (Figure 3A). A split plot ANOVA examining group differences in longitudinal FC  
557 changes revealed a non-significant group x session interaction ( $F(2,34)=2.519$ ,  $p=0.095$ )  
558 although there was a trend.

559  
560 Our ROI in right premotor cortex exhibited FC increases with bilateral primary visual cortex  
561 (V1) during HDBR+CO<sub>2</sub>, which decreased after bed rest (Figure 3B). A split-plot ANOVA  
562 revealed a significant group x session interaction on FC values ( $F(2,34)=4.485$ ,  $p=0.019$ ). This  
563 indicated differential patterns of FC changes from the baseline phase to the HDT29 session in  
564 which the HDBR+CO<sub>2</sub> group exhibited a greater increase during the bed rest phase.

565  
566 The ROI in left putamen showed increased FC with clusters in right superior and middle frontal  
567 gyrus during HDBR+CO<sub>2</sub>, which reversed after bed rest (Figure 3C). The time course of FC for  
568 the HDBR+CO<sub>2</sub> group was significantly different from that of the HDBR control  
569 ( $F(2,34)=4.049$ ,  $p=0.026$ ) such that the HDBR+CO<sub>2</sub> showed greater FC increases during bed  
570 rest. The ROI in left putamen also exhibited FC decreases between left superior frontal gyrus,  
571 bilateral lateral occipital cortices, and bilateral posterior cingulate cortices during bed rest,  
572 followed by a reversal post-bed rest (Figure 3C). A split-plot ANOVA revealed a significant  
573 group x session interaction on FC values ( $F(2,34)=3.961$ ,  $p=0.028$ ), suggesting that FC decreases  
574 during bed rest were greater for the HDBR+CO<sub>2</sub> group.

575  
576 The ROI in right middle frontal gyrus exhibited FC decreases with a distributed network during  
577 bed rest including bilateral insular cortices, left primary somatosensory cortex, left lateral  
578 occipital cortex, right supplementary motor area, and right posterior cingulate cortex (Figure  
579 3D). However, the clusters in left primary somatosensory cortex and left lateral occipital cortex  
580 did not survive post hoc Benjamini-Hochberg FDR correction. Consequently, FC values from  
581 these 2 clusters were omitted from the FC plot on the far right of Figure 3D and omitted from our  
582 split-plot ANOVA. The longitudinal pattern of FC changes significantly differed between the

583 two groups ( $F(2,34)=3.92$ ,  $p=0.029$ ) such that the HDBR+CO<sub>2</sub> showed greater FC decreases  
 584 during bed rest.

585  
 586 Finally, left insula showed decreased FC with right SFG, right SPL, and cerebellar crus I and II,  
 587 followed by a reversal after bed rest (Figure 3E). Cluster coordinates and statistics are presented  
 588 in Table 2. A split-plot ANOVA revealed a significant group x session interaction on FC values  
 589 ( $F(2,34)=11.046$ ,  $p= 0.0002$ ) demonstrating that the HDBR+CO<sub>2</sub> group exhibited greater FC  
 590 decreases from the baseline phase to HDT29 compared to the HDBR control group.

591

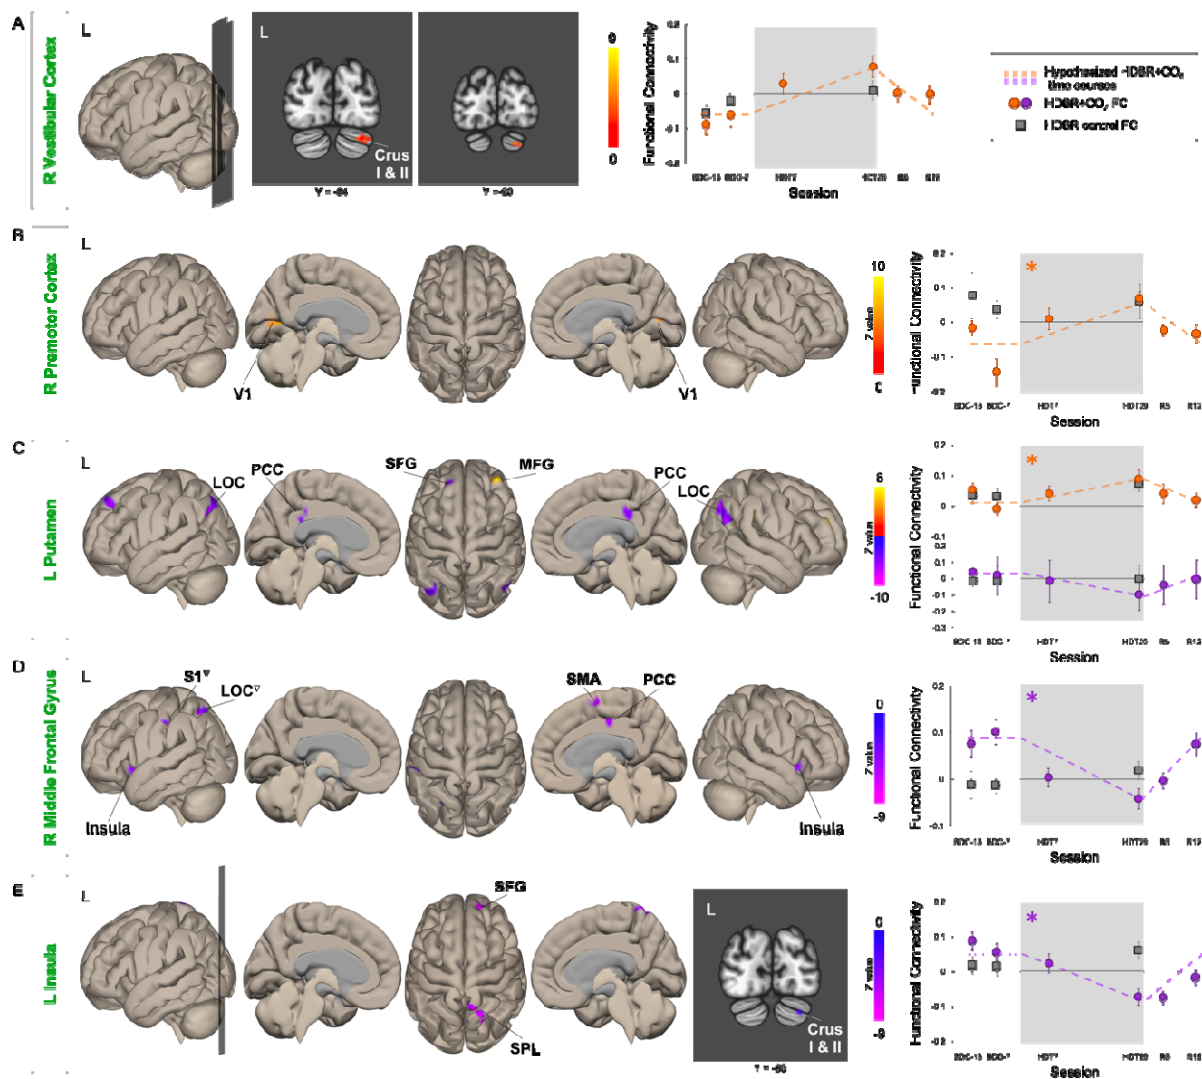

592  
 593 **Figure 3. Time Course of Functional Connectivity Changes with HDBR+CO<sub>2</sub>.** Results of our  
 594 seed-to-voxel analyses, with each ROI indicated in green font. Significant clusters that exhibited

595 FC increases during HDBR+CO<sub>2</sub> followed by a post-bed rest reversal are shown in warm colors.  
 596 Significant clusters that exhibited FC decreases during HDBR+CO<sub>2</sub> followed by a post-bed rest  
 597 reversal are shown in purple. Plots on the right represent session-wise functional connectivity  
 598 values averaged across all clusters. Results from the HDBR+ CO<sub>2</sub> group are indicated by colored  
 599 circles. FC values across all clusters were extracted from the HDBR control group and are  
 600 indicated by grey squares. <sup>∇</sup> indicates a cluster that did not survive the post hoc Benjamini-  
 601 Hochberg FDR correction. \* indicates a significant group x session interaction. Error bars  
 602 represent standard error. L, left; R, right; FC, functional connectivity; BDC, baseline data  
 603 collection; HDT, head-down tilt; R, recovery.

604

|                  | ROI                        | Target cluster                          | MNI Coordinates          |     |       | T value | Cluster size | Cluster-level uncorr p |
|------------------|----------------------------|-----------------------------------------|--------------------------|-----|-------|---------|--------------|------------------------|
|                  |                            |                                         | x                        | y   | z     |         |              |                        |
| <b>Increases</b> | R vestibular cortex        | R cerebellar crus I & II                | 26                       | -86 | -26   | 8.45    | 36           | 0.00050                |
|                  | R premotor cortex          | Bilateral primary visual cortex         | 16                       | -78 | 8     | 6.99    | 48           | 0.00005                |
|                  | L putamen                  | R middle frontal gyrus                  | 36                       | 46  | 26    | 9.18    | 61           | 0.000008               |
| <b>Decreases</b> | L putamen                  | L lateral occipital cortex              | -40                      | -64 | 32    | -9.59   | 60           | 0.000010               |
|                  |                            | R lateral occipital cortex              | 42                       | -68 | 40    | -8.18   | 29           | 0.0008                 |
|                  |                            | Posterior cingulate gyrus               | 0                        | -36 | 36    | -7.72   | 51           | 0.000031               |
|                  | R middle frontal gyrus     | L insular cortex                        | -28                      | 10  | 10    | -10.62  | 63           | 0.000008               |
|                  |                            | L lateral occipital cortex <sup>∇</sup> | -26                      | -58 | 52    | -7.72   | 25           | 0.001739               |
|                  |                            | R insular cortex                        | 42                       | 10  | -2    | -9.55   | 39           | 0.000194               |
|                  |                            | R posterior cingulate gyrus             | 10                       | -16 | 42    | -9.29   | 39           | 0.000016               |
|                  |                            | L postcentral gyrus <sup>∇</sup>        | -40                      | -30 | 38    | -7.45   | 24           | 0.00174                |
|                  |                            | Supplementary motor area                | 0                        | -2  | 62    | -9.24   | 59           | 0.000013               |
|                  |                            | L insular cortex                        | R cerebellar crus I & II | 26  | -88   | -32     | -12.15       | 62                     |
| L insular cortex | R lateral occipital cortex | 12                                      | -52                      | 68  | -7.08 | 45      | 0.000164     |                        |
|                  | R superior frontal gyrus   | 16                                      | 52                       | 28  | -8.07 | 44      | 0.000187     |                        |

605

606 **Table 2.** Significant clusters from our seed-to-voxel analyses assessing FC change time courses.  
607 Top rows indicate ROIs and clusters that exhibited FC increases during HDBR+CO<sub>2</sub> followed by  
608 FC decrease during the post-bed rest recovery period. Bottom rows indicate ROIs and clusters  
609 that exhibited FC decreases during HDBR+CO<sub>2</sub> then FC increase following bed rest. Cluster size  
610 refers to the number of voxels in each cluster. Cluster size uncorr p refers to uncorrected cluster  
611 size *p*-values. <sup>∇</sup> indicates a cluster that did not survive the post hoc Benjamini-Hochberg FDR  
612 correction. L, left; R, right; ROI, region of interest; uncorr, uncorrected.

613

#### 614 *Voxel-to-voxel analyses*

615 Voxel-to-voxel analyses revealed a significant cluster within right primary visual cortex.  
616 Intrinsic connectivity contrast (ICC) within right V1 decreased during HDBR+CO<sub>2</sub> then  
617 increased during the post-bed rest recovery phase (Figure 4, Table 3). A split-plot ANOVA  
618 examining group differences in longitudinal ICC changes revealed a non-significant group x  
619 session interaction ( $F(2,34)=2.172$ ,  $p=0.130$ ) although there was a trend.

620

621

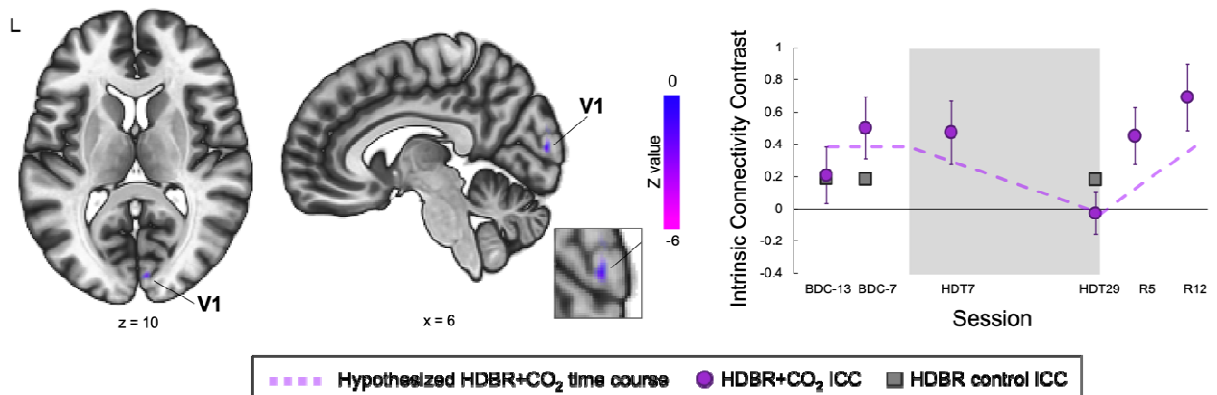

622

623 **Figure 4. Time Course of Intrinsic Connectivity Contrast (ICC) with HDBR+CO<sub>2</sub>.** Results  
624 of our voxel-to-voxel analyses. A cluster in right primary visual cortex exhibited decreased  
625 connectivity during HDBR+CO<sub>2</sub> followed by a reversal during the recovery phase (colored  
626 circles). ICC values across all clusters were extracted from the HDBR control group and are  
627 indicated by grey squares. The inset shows an enlarged sagittal view of the cluster. The plot on  
628 the right reflects average Fisher Z-transformed intrinsic connectivity contrast (ICC) estimates  
629 across all subjects. Error bars represent standard error. Dashed lines represent our hypothesized  
630 longitudinal model. L, left; BDC, baseline data collection; HDT, head-down tilt; R, recovery.

| Cluster                 | MNI Coordinates |     |    | T value | Cluster size | Cluster-level uncorr p |
|-------------------------|-----------------|-----|----|---------|--------------|------------------------|
|                         | x               | y   | z  |         |              |                        |
| R primary visual cortex | 6               | -88 | 10 | -9.85   | 46           | 0.00001                |

631  
 632 **Table 3.** Significant cluster from our voxel-to-voxel analyses assessing FC change time courses.  
 633 Cluster size refers to the number of voxels in each cluster. Cluster-level uncorr p refers to  
 634 uncorrected cluster size  $p$ -values. R, right; uncorr, uncorrected.

635

### 636 Associations Between Functional Connectivity and Behavior Changes

637

638 Lee and colleagues (2019) recently contrasted behavioral changes during our HDBR+CO<sub>2</sub>  
 639 intervention compared to our previous ambient air HDBR study. Here we examined brain-  
 640 behavior associations for those behavioral measures that exhibited differential changes during  
 641 HDBR+CO<sub>2</sub> compared to our previous ambient air HDBR study. Lee et al. reported that response  
 642 variability on the rod and frame test remained consistent during HDBR in ambient air, but  
 643 decreased during HDBR+CO<sub>2</sub>. While both interventions resulted in slowed performance on the  
 644 Functional Mobility Test, the degree of slowing was greater for the HDBR+CO<sub>2</sub> group.  
 645 Therefore, subjects who underwent the HDBR+CO<sub>2</sub> intervention exhibited improved consistency  
 646 of visual orientation perception compared to the ambient air HDBR group. However, the  
 647 HDBR+CO<sub>2</sub> group exhibited greater mobility impairments compared to the ambient air HDBR  
 648 group (Lee et al., 2019). Figure 5 shows the evolution of each of the behavioral measures across  
 649 all sessions for the HDBR+CO<sub>2</sub> group only.

650

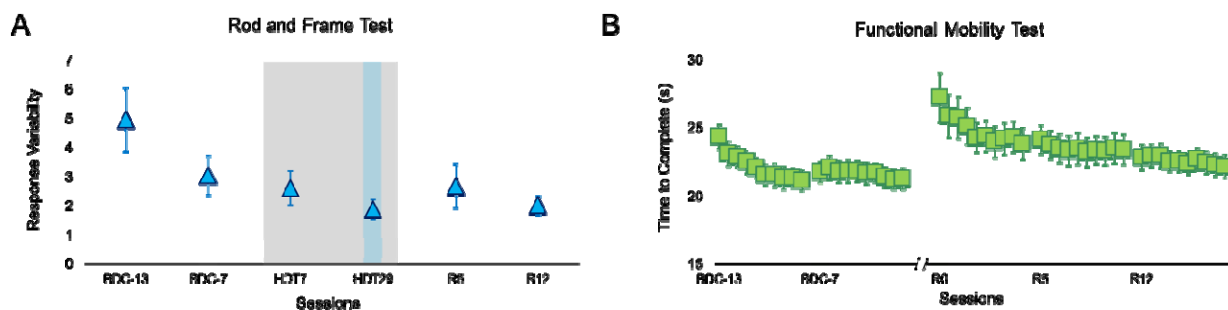

651



652 **Figure 5. Performance on behavioral assessments.** Session-wise group average of response  
653 variability on the rod and frame test (A) and time to complete each trial of the Functional  
654 Mobility Test (B). Error bars represent SEM. The gray shaded region indicates the HDBR+CO<sub>2</sub>  
655 phase. Colored bars indicate data used for pre- to post-bed rest performance comparisons. BDC,  
656 baseline data collection; HDT, head-down tilt; R, recovery.

657

658 We also examined how pre- to post-bed rest FC changes related to behavioral changes across  
659 subjects in the HDBR+CO<sub>2</sub> group.

660

### 661 *Rod and Frame Test*

662 On average, subjects' responses showed reduced variability (i.e., increased consistency) during  
663 HDBR+CO<sub>2</sub> (Figure 5A). However, as shown in scatterplots in Figure 6, individual subjects  
664 differed in the direction and extent of response variability changes with HDBR+CO<sub>2</sub>. We found  
665 that post-bed rest FC decreases between left frontal eye field (FEF) and right lateral occipital  
666 cortex (LOC) were associated with decreased response variability (i.e., increased consistency)  
667 following bed rest (see Figure 6A). FC decreases between left insula and left primary  
668 somatosensory cortex (S1) were also associated with decreases in response variability. Finally,  
669 we also observed a relationship between connectivity changes within the default mode network  
670 and performance changes on the rod and frame test (Figure 6C). Post-bed rest FC decreases  
671 between left posterior cingulate cortex, left superior frontal gyrus, and right superior parietal  
672 lobule (SPL) were associated with decreases in response variability. The scatterplots on the right  
673 show the relationship between pre-to-post-HDBR+CO<sub>2</sub> performance changes, which were used  
674 as the regressor of interest, and FC changes across subjects. Scatterplots are intended for  
675 illustrative purposes. A further correlation analysis was not performed because the  
676 nonindependence of such an analysis would inflate the effect size (Poldrack & Mumford, 2009).  
677 Cluster coordinates and statistics are presented in Table 4. Results were qualitatively similar if  
678 we used the subjects' slope of behavioral change across BDC-7, HDT7, and HDT29 as our  
679 regressor of interest.

680

681

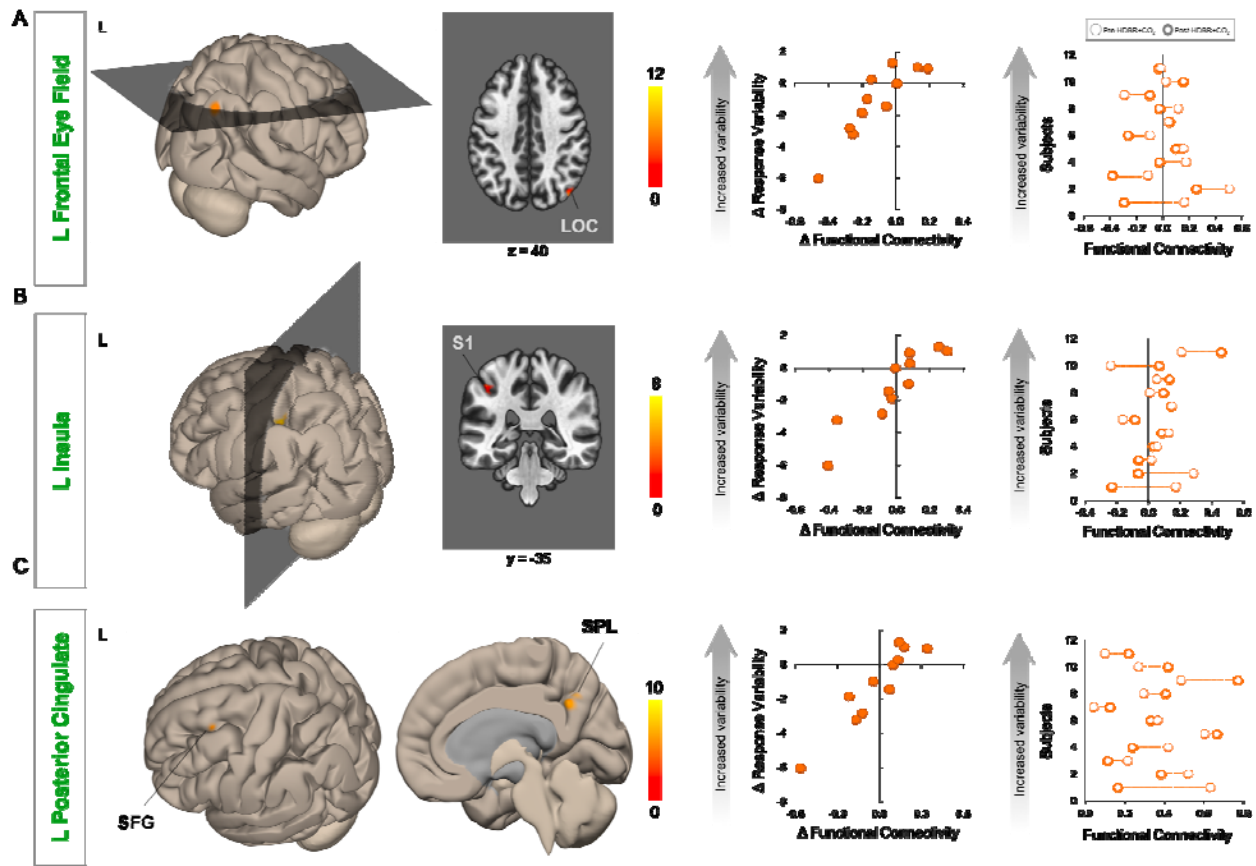

682

683

684 **Figure 6. Pre- to Post-HDBR+CO<sub>2</sub> changes in FC and response variability on the rod and**

685 **frame test.** Results of our seed-to-voxel analyses, with each ROI indicated in green font.

686 Columns 1 and 2 show clusters that exhibited FC increases that were significantly associated

687 with response variability increases from pre- to post-bed rest. Changes in response variability are

688 plotted against functional connectivity changes in column 3 to illustrate the direction of the

689 effect. The plot in column 4 shows subject-wise functional connectivity values before and after

690 HDBR+CO<sub>2</sub>. Subjects are rank-ordered along the y-axis according to increasing response

691 variability. L, left; LOC, lateral occipital cortex; S1, primary somatosensory cortex; SFG,

692 superior frontal gyrus; SPL, superior parietal lobule; BDC, baseline data collection; HDT, head-

693 down tilt; FC, functional connectivity; HDBR+CO<sub>2</sub>, head-down tilt bed rest with elevated CO<sub>2</sub>.

694

695

| ROI                                 | Target cluster             | MNI Coordinates |     |    | T value | Cluster size | Cluster-level uncorr p |
|-------------------------------------|----------------------------|-----------------|-----|----|---------|--------------|------------------------|
|                                     |                            | x               | y   | z  |         |              |                        |
| <b>L frontal eye field</b>          | R lateral occipital cortex | 42              | -76 | 40 | 12.99   | 48           | 0.000029               |
| <b>L insular cortex</b>             | L postcentral gyrus        | -40             | -36 | 48 | 12.57   | 50           | 0.00028                |
| <b>L posterior cingulate cortex</b> | L superior frontal gyrus   | -34             | 12  | 64 | 9.26    | 38           | 0.000123               |
|                                     | R superior parietal lobule | 6               | -54 | 36 | 9.37    | 35           | 0.000199               |

696

697 **Table 4.** MNI coordinates of clusters that showed post-bed rest FC changes that were  
698 significantly associated with changes in response variability on the rod and frame test. Cluster  
699 size refers to the number of voxels in each cluster. Cluster-level uncorr p refers to  
700 uncorrected cluster size *p*-values. ROI, region of interest; L, left; R, right; uncorr, uncorrected.

701

#### 702 *Functional Mobility Test*

703 All subjects exhibited slowing on the Functional Mobility Test (i.e., increases in completion  
704 times) following HDBR+CO<sub>2</sub> (see Figures 5C, Figure 8), however, the extent of slowing varied  
705 across subjects. Post-bed rest FC increases between left primary motor cortex and left visual area  
706 V5 were associated with greater slowing on the Functional Mobility Test (Figure 8A). FC  
707 increases between right premotor cortex and left cerebellar crus I were also associated with  
708 greater slowing on the Functional Mobility Test following bed rest (see Figure 8B). Post-bed rest  
709 FC decreases between left primary visual cortex and right inferior parietal lobule were associated  
710 with greater slowing on the Functional Mobility Test. In contrast, subjects who exhibited  
711 increased FC between these areas showed less slowing. Cluster statistics are summarized in  
712 Table 6.

713

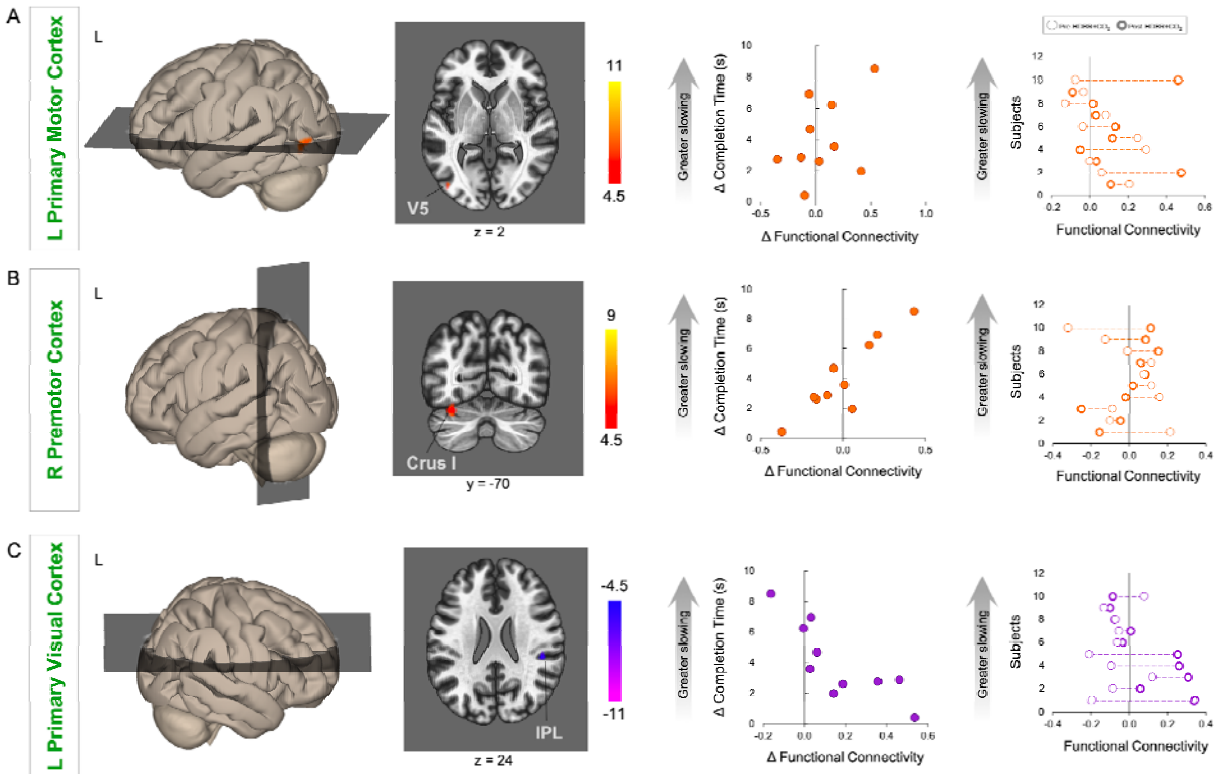

714

715 **Figure 7. Pre- to Post-HDBR+CO<sub>2</sub> changes in FC and time to complete the Functional**  
 716 **Mobility Test.** Results of our seed-to-voxel analyses, with each ROI indicated in green font.  
 717 Clusters that exhibited post-HDBR+CO<sub>2</sub> FC increases that were significantly associated with  
 718 increases in Functional Mobility Test completion time. Changes in completion time are plotted  
 719 against functional connectivity changes in column 3 to indicate the direction of the effect. The  
 720 plot on the far right shows subject-wise functional connectivity values before and after  
 721 HDBR+CO<sub>2</sub>. Subjects are rank-ordered along the y-axis according to increasing slowing of  
 722 mobility. L, left; R, right; IPL, inferior parietal lobule.

| ROI                            | Target cluster             | MNI Coordinates |     |     | T value | Cluster size | Cluster-level uncorr p |
|--------------------------------|----------------------------|-----------------|-----|-----|---------|--------------|------------------------|
|                                |                            | x               | y   | z   |         |              |                        |
| <b>R primary motor cortex</b>  | L V5                       | -44             | -76 | 2   | 12.79   | 34           | 0.000101               |
| <b>R premotor cortex</b>       | L cerebellar crus I        | -34             | -70 | -26 | 10.57   | 51           | 0.000002               |
| <b>L primary visual cortex</b> | R inferior parietal lobule | 44              | -34 | 24  | -10.38  | 25           | 0.000279               |

723

724 **Table 5.** MNI coordinates of clusters that showed post-bed rest FC changes that were  
725 significantly associated with changes in time to complete the Functional Mobility Test. Cluster  
726 size refers to the number of voxels in each cluster. Cluster-level uncorr p refers to  
727 uncorrected cluster size *p*-values. ROI, region of interest; L, left; R, right; uncorr, uncorrected.

728

729 *Voxel-to-voxel analyses*

730 Voxel-to-voxel brain-behavioral analyses did not yield any statistically significant clusters.

731

## 732 **DISCUSSION**

733 The aim of the current study was to investigate brain and behavioral effects of prolonged  
734 exposure to simulated microgravity and elevated CO<sub>2</sub> levels as a model of long-duration  
735 spaceflight onboard the International Space Station. To this end, we tested how 30 days of head-  
736 down tilt bed rest in 0.5% CO<sub>2</sub> affected resting-state functional brain connectivity. Our  
737 hypothesis-driven approach revealed that 30 days of HDBR in elevated CO<sub>2</sub> resulted in resting-  
738 state FC increases among vestibular, motor, and primary visual brain areas, which decreased  
739 following bed rest. These brain areas are involved in balance and spatial orientation, the  
740 planning, control, coordination and adaptation of voluntary movement, and low-level visual  
741 processing, respectively. In contrast, we found decreases in resting-state FC involving motor,  
742 somatosensory, vestibular, cognitive, and multimodal integration regions during bed rest, which  
743 increased following bed rest. These are brain areas implicated in voluntary movement planning,  
744 sensorimotor control and somatosensation, balance and spatial orientation, attention and  
745 awareness (Leech and Sharp, 2014), and visuospatial perception, respectively. Our hypothesis-  
746 free analysis revealed that connectivity within right primary visual cortex gradually decreased  
747 during the HDBR+CO<sub>2</sub> intervention, then increased during the post-bed rest recovery phase.  
748 However, upon comparing the longitudinal ICC change of the HDBR+CO<sub>2</sub> group with those of  
749 the HDBR control group, the two groups did not show a significantly different pattern of ICC  
750 change -- although there was a trend toward greater decreases for the HDBR+CO<sub>2</sub> group.

751

752 Liao and colleagues (2012; 2013; 2015) have previously investigated resting-state activity  
753 changes during short duration HDBR interventions in ambient air. Employing a 7-day 6° HDBR  
754 intervention, they examined changes in the amplitude of low frequency fluctuations (ALFF) at

755 baseline and on each day of their HDBR intervention. During bed rest, subjects exhibited  
756 increased ALFF in anterior cingulate cortex and the posterior lobe of the cerebellum as well as  
757 ALFF decreases in posterior cingulate cortex and left paracentral lobule (Liao et al., 2015). Here,  
758 we similarly found FC decreases involving posterior cingulate cortex during HDBR+CO<sub>2</sub>.  
759 However, it is worth noting that Liao et al. (2015) did not leverage the longitudinal nature of  
760 their experimental design; they performed a one-way ANOVA across all time points followed by  
761 pairwise comparisons between each day of the HDT period versus the baseline phase.

762

763 Recent studies have examined the effects of long-duration HDBR in ambient air on large scale  
764 resting-state networks (Cassady et al., 2016; Zhou et al., 2014). Zhou et al (2014) used graph-  
765 theory based analyses to investigate pre- to post-bed rest FC changes. Following 45 days of  
766 HDBR in ambient air, subjects showed decreased degree centrality in the left anterior insula and  
767 dorsal anterior cingulate cortex. In the current study, we similarly observed widespread FC  
768 decreases involving insular cortices.

769

770 The current study built upon our recent work which demonstrated FC changes associated with 70  
771 days of HDBR in ambient air. As in the current study, Cassady et al (2016) assessed connectivity  
772 changes from pre-, during, to post-bed rest using an analysis which incorporated both between-  
773 and within-subjects factors in the analysis. This type of analysis leveraged the longitudinal nature  
774 of the experimental design. It allowed for the identification of not only pre- to post-bed rest  
775 changes, but also the time course of FC changes throughout bed rest, using subjects' baseline  
776 measures as their own controls. Cassady et al (2016) showed gradual FC increases between  
777 primary motor and somatosensory cortices, and between vestibular cortex and lobule VI within  
778 the ipsilateral cerebellar hemisphere, which decreased after bed rest. They also showed gradual  
779 FC decreases between posterior parietal cortex and temporal-occipital cortex, between cerebellar  
780 lobule VIII and postcentral gyrus, and between the superior posterior fissure and crus I of the  
781 cerebellum. In the current study, we used similar analyses and identical regions of interests as  
782 Cassady et al (2016) to aid in drawing parallels between our results. Similar to the 70-day  
783 ambient air HDBR results, we observed gradual FC increases between vestibular cortex and the  
784 cerebellum with bed rest, albeit the cerebellar cluster here spanned Crus I and II of the  
785 contralateral hemisphere (which are part of the default mode network and networks involved in

786 cognitive control (Buckner et al., 2011). Reinforcing this similarity with the results of Cassady et  
787 al. (2016), the HDBR control group included in the present study exhibited a similar FC increase  
788 between vestibular cortex and crus I and II of the cerebellum as the HDBR+CO<sub>2</sub> group. This  
789 finding suggests that this result is driven by undergoing strict HDBR as opposed to the  
790 combination of HDBR and elevated CO<sub>2</sub>. A notable qualitative difference between the results of  
791 the current study and those of Cassady et al (2016) is that HDBR+CO<sub>2</sub> resulted in a wider spread  
792 pattern of functional decoupling among motor, somatosensory, vestibular, cognitive, and  
793 multimodal integration brain areas.

794

795 To our knowledge, only one published study has examined resting-state FC changes following  
796 spaceflight. In their case study of a single cosmonaut who spent 169 days onboard the ISS,  
797 Demertzi et al (2016) reported post-flight reductions in intrinsic connectivity within the right  
798 insula and ventral posterior cingulate cortex as well as decreased FC between the cerebellum and  
799 motor cortex. It is noteworthy that the cosmonaut exhibited decreases in FC involving the insula  
800 and posterior cingulate cortex -- brain areas part of distributed networks that exhibited FC  
801 decreases during our HDBR+CO<sub>2</sub> intervention. Furthermore, we found that this functional  
802 encompassing bilateral insular cortices and right PCC exhibited a distinct pattern of FC changes  
803 during HDBR+CO<sub>2</sub> compared to our HDBR control group. This finding suggests that the  
804 observed connectivity changes were not due to strict HDBR alone, but rather were due to the  
805 combination of strict HDBR and elevated CO<sub>2</sub>.

806

807 When comparing our results across resting-state fMRI studies of spaceflight and spaceflight  
808 analog environments, the most notable commonalities are FC decreases involving the insula and  
809 posterior cingulate cortex. The insula is an integral part of the vestibular network. The vestibular  
810 system uses multisensory cues (e.g., visual, somatosensory, auditory, and vestibular cues) for  
811 spatial orientation, self-motion perception, gaze stabilization, and postural control (Balaban,  
812 2016). During spaceflight and in spaceflight analog environments, these multimodal cues  
813 provide incongruent information, requiring the central nervous system to adaptively reweight  
814 sensory inputs. The observed FC decreases among motor, somatosensory, vestibular, cognitive,  
815 and multimodal integration brain areas during HDBR+CO<sub>2</sub> may reflect such multisensory  
816 reweighting. The posterior cingulate cortex (PCC) is a core region of the default mode network,

817 which is activated during internally-focused cognition such as introspection, autobiographical  
818 memory retrieval, etc. (Buckner et al., 2008). Regions within the PCC are also part of other  
819 resting-state networks including the sensorimotor, salience, fronto-parietal, and dorsal attention  
820 networks. The functional role(s) of the PCC remain debated, however, theories suggest its  
821 involvement in internally-directed thought and controlling balance between external and internal  
822 attention (Leech and Sharp, 2014). FC changes involving the PCC may be related to changes in  
823 internally-focused cognition during bed rest. These commonalities support the validity of HDBR  
824 as a model for studying spaceflight-associated functional neuroplasticity.

825

826 Moreover, unique to our HDBR+CO<sub>2</sub> intervention were FC changes involving visual brain areas,  
827 namely primary visual cortex (V1) and lateral occipital cortex (LOC). V1 is involved in  
828 processing low-level visual features (Tootell et al., 1998). LOC is involved in visual object  
829 recognition, but is especially active when viewing inverted visual stimuli (e.g., faces and objects)  
830 (Aguirre et al., 1999). This is an interesting finding since the subjects' heads were tilted down  
831 and they would have had a partially inverted view of the experimenters and their surroundings.  
832 Although a non-significant trend compared to our HDBR control group, our observation of  
833 reduced ICC within V1 during HDBR+CO<sub>2</sub> is interesting in light of a recent 'multihit'  
834 hypothesis that elevated CO<sub>2</sub> levels onboard the ISS contribute to the development of ophthalmic  
835 abnormalities and visual impairments collectively known as Spaceflight Associated Neuro-  
836 ocular Syndrome (SANS)(Zwart et al., 2017; Smith and Zwart, 2018), which affects  
837 approximately 30% of astronauts returning from long-duration spaceflight (Mader et al., 2011;  
838 Mader and Robert Gibson, 2017). This multihit hypothesis posits that a cascade of anatomical  
839 and physiologic changes in microgravity (e.g., CO<sub>2</sub>-induced cerebral blood flow increases,  
840 headward fluid shifts, vascular leakage, edema) block CSF drainage which increases pressure on  
841 the optic nerve and eye, ultimately resulting in neuro-ocular impairment (Zwart et al., 2017;  
842 Smith and Zwart, 2018). It is feasible that increases in pressure exerted on the posterior segment  
843 of the eye and/or the optic nerve could affect visual inputs to V1 and contribute to reduced  
844 intrinsic connectivity. However, future study is needed to investigate this issue. Interestingly,  
845 Laurie et al. (2019) collected optical coherence tomographic images before and at the end of  
846 HDBR+CO<sub>2</sub>. They found that 5 of the 11 subjects in the current study developed optic disc  
847 edema -- one of the signs of SANS -- during the intervention. To our knowledge, this is the first



848 HDBR study to observe ophthalmic changes in participants. Comparisons of brain connectivity  
849 changes between the subgroups who did and did not develop signs of SANS during HDBR+CO<sub>2</sub>  
850 will be reported in a subsequent paper.

851  
852 We also investigated if FC changes following HDBR+CO<sub>2</sub> were associated with behavioral  
853 performance alterations across subjects. We used a rod and frame test to estimate subjects' visual  
854 perception of true vertical. On average, subjects' responses became more consistent (i.e., lower  
855 response variability) during the HDBR+CO<sub>2</sub> intervention. This may reflect practice effects  
856 and/or the use of sensory reweighting as a strategy to improve trial-to-trial response consistency.  
857 We found that FC decreases between visual, vestibular and somatosensory brain areas were  
858 associated with increases in response consistency on the rod and frame test following bed rest.  
859 FC reductions between brain areas within the default mode network (i.e., PCC, SFG, and SPL  
860 (Buckner et al., 2008)) was also associated with improvements in response consistency. In  
861 contrast, subjects who exhibited increased FC between default mode network areas or between  
862 visual, vestibular and somatosensory brain areas tended to show increased response variability.  
863 The observed functional decoupling between visual, somatosensory and vestibular-related brain  
864 areas may reflect changes in sensory weighting that ultimately improve visual orientation  
865 perception following HDBR+CO<sub>2</sub>.

866  
867 Subjects exhibited varying degrees of slowing on the Functional Mobility Test following our  
868 HDBR+CO<sub>2</sub> intervention. FC increases between primary motor cortex (M1) and V5 (also known  
869 as hMT+, a higher order visual region involved in visual motion processing (Zeki et al., 1991))  
870 and between premotor cortex and Crus I of the cerebellum were associated with greater slowing  
871 on the Functional Mobility Test after bed rest. Those subjects who exhibited decreases in FC  
872 between these areas showed less slowing. This finding suggests a link between functional  
873 decoupling among motor and higher order visual areas and less deterioration of locomotor  
874 abilities following HDBR+CO<sub>2</sub>. We also found that FC decreases between V1 and inferior  
875 parietal lobule (IPL) were associated with greater slowing on the Functional Mobility Test.  
876 Subjects who exhibited FC increases between V1 and IPL showed less deterioration on the  
877 Functional Mobility Test. Primary visual cortex is involved in low-level visual processing  
878 (Tootell et al., 1998). It is believed that the IPL is involved in performing sensorimotor

879 transformations (Rushworth et al., 1998), with some studies also reporting its involvement  
880 during preparation of foot movements (Sahyoun et al., 2004), and learning sequences of foot  
881 movements (Lafleur et al., 2002). This result suggests a compensatory benefit of V1 and IPL  
882 interactions following HDBR+CO<sub>2</sub>.

883

884 Prolonged exposure to elevated CO<sub>2</sub> levels may affect brain vascular function and neural  
885 activity, which cannot be disassociated using fMRI (Buxton, 2013). In the current study, Laurie  
886 et al. (2019) acquired measures of end-tidal PCO<sub>2</sub>, which did not show a significant change from  
887 the beginning to the end of the HDBR+CO<sub>2</sub> intervention. Laurie et al. (2020) also recently  
888 reported that arterial partial pressure of carbon dioxide (PaCO<sub>2</sub>) and cerebrovascular reactivity to  
889 CO<sub>2</sub> did not differ between the baseline and HDBR+CO<sub>2</sub> phases. However, analyses of blood  
890 samples collected as part of NASA's standard measures assessment in the current study showed  
891 a small but significant increase in PaCO<sub>2</sub> from pre- to post-HDBR+CO<sub>2</sub>. Changes in cerebral  
892 perfusion may therefore contribute to the observed brain connectivity changes. However, since  
893 we did not have an ambulatory + CO<sub>2</sub> group, we cannot fully determine if any of the observed  
894 brain changes are due to elevated CO<sub>2</sub> exposure alone.

895

896 A limitation of the current study is the small sample sizes for the HDBR+CO<sub>2</sub> (n=11) and HDBR  
897 control (n=8) groups. While the inclusion of FC data from the HDBR control group provides  
898 insight into whether the observed FC changes are due to strict HDBR or the combined effects of  
899 CO<sub>2</sub> during strict HDBR, the HDBR control group is not ideal. First, the HDBR control data  
900 were collected as part of a subsequent bed rest study which was conducted approximately one  
901 year following data collection for the HDBR+CO<sub>2</sub> group. The timeline of the HDBR control  
902 group differs from that of the HDBR+CO<sub>2</sub> group, with the HDBR control group undergoing 60  
903 days of HDBR. The HDBR control group also included few females (6 males, 2 females).  
904 Finally, practice effects on the rod and frame test performance present a further limitation.  
905 Response variability on the rod and frame test showed a clear learning curve across sessions.  
906 While post-bed rest increases in response variability support an effect of the HDBR+CO<sub>2</sub>  
907 intervention, it is currently not possible to disentangle effects of practice from the effects of the  
908 HDBR+CO<sub>2</sub> intervention.

909

910 Here we investigated the time courses of resting-state FC changes from before, during, to after  
911 30 days of HDBR in elevated CO<sub>2</sub>. Our hypothesis-driven approach showed FC increases among  
912 visual, vestibular, and motor brain areas during HDBR+CO<sub>2</sub> which decreased following bed rest  
913 as well as widespread FC decreases among vestibular, visual, somatosensory and motor brain  
914 areas which increased following bed rest. Our hypothesis-free approach revealed a trend  
915 whereby FC decreases within primary visual cortex during HDBR+CO<sub>2</sub>. We further examined  
916 relationships between FC changes and behavioral changes associated with HDBR+CO<sub>2</sub>. We  
917 found that post-bed rest FC changes between visual, vestibular, and somatosensory regions were  
918 associated with changes in the consistency of visual perception of true vertical. Finally, we found  
919 that post-bed rest FC changes between visual and motor brain areas related to slowing of  
920 locomotor performance across subjects. We propose that these alterations of resting-state  
921 functional connectivity are a reflection of bed rest-associated multisensory reweighting and CO<sub>2</sub>-  
922 related changes in cerebral perfusion. Our findings provide novel insight into the functional  
923 neuroplastic mechanisms underlying adaptation to HDBR+CO<sub>2</sub> microgravity analog  
924 environment. This knowledge will further improve HDBR as a model of microgravity exposure,  
925 and contribute to our knowledge of brain and performance changes during and after spaceflight.  
926

## 927 REFERENCES

- 928 Aguirre, G.K., Singh, R., D'Esposito, M., 1999. Stimulus inversion and the responses of face and  
929 object-sensitive cortical areas. *Neuroreport* 10, 189–194.
- 930 Balaban, C.D., 2016. Neurotransmitters in the vestibular system. *Handb. Clin. Neurol.* 137, 41–  
931 55.
- 932 Behzadi, Y., Restom, K., Liao, J., Liu, T.T., 2007. A component based noise correction method  
933 (CompCor) for BOLD and perfusion based fMRI. *Neuroimage* 37, 90–101.
- 934 Benjamini, Y., Hochberg, H. (1995). Controlling the false discovery rate: a practical and  
935 powerful approach to multiple testing. *J. R. Stat. Soc. Seri B* 57, 289–300.
- 936 Biswal, B., Yetkin, F.Z., Haughton, V.M., Hyde, J.S., 1995. Functional connectivity in the motor  
937 cortex of resting human brain using echo-planar MRI. *Magn. Reson. Med.* 34, 537–541.
- 938 Bloomberg, J.J., Mulavara, A.P., 2003. Changes in walking strategies after spaceflight. *IEEE*  
939 *Eng. Med. Biol. Mag.* 22, 58–62.
- 940 Buckner, R.L., Andrews-Hanna, J.R., Schacter, D.L., 2008. The Brain's Default Network.  
941 *Annals of the New York Academy of Sciences.* <https://doi.org/10.1196/annals.1440.011>
- 942 Buckner, R.L., Krienen, F.M., Castellanos, A., Diaz, J.C., Yeo, B.T.T., 2011. The organization  
943 of the human cerebellum estimated by intrinsic functional connectivity. *J. Neurophysiol.*  
944 106, 2322–2345.
- 945 Buxton, R. B. (2013). The physics of functional magnetic resonance imaging (fMRI). *Reports on*  
946 *Progress in Physics*, 76(9), 096601.
- 947 Carass, A., Cuzzocreo, J. L., Han, S., Hernandez-Castillo, C. R., Rasser, P. E., Ganz, M., ... &  
948 Thyreau, B. (2018). Comparing fully automated state-of-the-art cerebellum parcellation  
949 from magnetic resonance images. *NeuroImage*, 183, 150-172.
- 950 Cassady, K., Koppelmans, V., Reuter-Lorenz, P., De Dios, Y., Gadd, N., Wood, S., Castenada,  
951 R.R., Kofman, I., Bloomberg, J., Mulavara, A., Seidler, R., 2016. Effects of a spaceflight  
952 analog environment on brain connectivity and behavior. *Neuroimage* 141, 18–30.
- 953 Chumbley, J., Worsley, K., Flandin, G., & Friston, K. (2010). Topological FDR for  
954 neuroimaging. *Neuroimage*, 49, 3057–3064.
- 955 Cohen, H.S., Kimball, K.T., Mulavara, A.P., Bloomberg, J.J., Paloski, W.H., 2012.  
956 Posturography and locomotor tests of dynamic balance after long-duration spaceflight. *J.*  
957 *Vestib. Res.* 22, 191–196.
- 958 Cole, D.M., Smith, S.M., Beckmann, C.F., 2010. Advances and pitfalls in the analysis and  
959 interpretation of resting-state FMRI data. *Front. Syst. Neurosci.* 4, 8.
- 960 Courtine, G., Pozzo, T., 2004. Recovery of the locomotor function after prolonged microgravity  
961 exposure. I. Head-trunk movement and locomotor equilibrium during various tasks. *Exp.*  
962 *Brain Res.* 158, 86–99.
- 963 Damoiseaux, J.S., S A R, Barkhof, F., Scheltens, P., Stam, C.J., Smith, S.M., Beckmann, C.F.,  
964 2006. Consistent resting-state networks across healthy subjects. *Proceedings of the National*  
965 *Academy of Sciences* 103, 13848–13853.
- 966 Demertzi, A., Van Ombergen, A., Tomilovskaya, E., Jeurissen, B., Pechenkova, E., Di Perri, C.,  
967 Litvinova, L., Amico, E., Rumshiskaya, A., Rukavishnikov, I., Sijbers, J., Sinitsyn, V.,  
968 Kozlovskaya, I.B., Sunaert, S., Parizel, P.M., Van de Heyning, P.H., Laureys, S., Wuyts,  
969 F.L., 2016. Cortical reorganization in an astronaut's brain after long-duration spaceflight.  
970 *Brain Struct. Funct.* 221, 2873–2876.
- 971 Diedrichsen, J., 2006. A spatially unbiased atlas template of the human cerebellum. *Neuroimage*

- 972 33, 127–138.
- 973 Fox, M.D., Snyder, A.Z., Vincent, J.L., Corbetta, M., Van Essen, D.C., Raichle, M.E., 2005. The  
974 human brain is intrinsically organized into dynamic, anticorrelated functional networks.  
975 Proc. Natl. Acad. Sci. U. S. A. 102, 9673–9678.
- 976 Hargens, A.R., Vico, L., 2016. Long-duration bed rest as an analog to microgravity. J. Appl.  
977 Physiol. 120, 891–903.
- 978 Kanas, N., Manzey, D., 2008. Space Psychology and Psychiatry. <https://doi.org/10.1007/978-1-4020-6770-9>
- 980 Koppelmans, V., Bloomberg, J.J., De Dios, Y.E., Wood, S.J., Reuter-Lorenz, P.A., Kofman, I.S.,  
981 Riascos, R., Mulavara, A.P., Seidler, R.D., 2017a. Brain plasticity and sensorimotor  
982 deterioration as a function of 70 days head down tilt bed rest. PLoS One 12, e0182236.
- 983 Koppelmans, V., Mulavara, A.P., Yuan, P., Cassady, K.E., Cooke, K.A., Wood, S.J., Reuter-  
984 Lorenz, P.A., De Dios, Y.E., Stepanyan, V., Szecsy, D.L., Gadd, N.E., Kofman, I., Scott,  
985 J.M., Downs, M.E., Bloomberg, J.J., Ploutz-Snyder, L., Seidler, R.D., 2015. Exercise as  
986 potential countermeasure for the effects of 70 days of bed rest on cognitive and  
987 sensorimotor performance. Front. Syst. Neurosci. 9, 121.
- 988 Koppelmans, V., Pasternak, O., Bloomberg, J.J., Dios, Y.E.D., Wood, S.J., Riascos, R., Reuter-  
989 Lorenz, P.A., Kofman, I.S., Mulavara, A.P., Seidler, R.D., 2017b. Intracranial Fluid  
990 Redistribution But No White Matter Microstructural Changes During a Spaceflight Analog.  
991 Sci. Rep. 7, 3154.
- 992 Lafleur, M.F., Jackson, P.L., Malouin, F., Richards, C.L., Evans, A.C., Doyon, J., 2002. Motor  
993 learning produces parallel dynamic functional changes during the execution and  
994 imagination of sequential foot movements. Neuroimage 16, 142–157.
- 995 Laurie, S. S., Macias, B. R., Dunn, J. T., Young, M., Stern, C., Lee, S. M. C., et al. 2019. Optic  
996 disc edema after 30 days of strict head-down tilt bed rest. Ophthalmology 126, 467–468.
- 997 Law, J., Van Baalen, M., Foy, M., Mason, S.S., Mendez, C., Wear, M.L., Meyers, V.E.,  
998 Alexander, D., 2014. Relationship between carbon dioxide levels and reported headaches on  
999 the international space station. J. Occup. Environ. Med. 56, 477–483.
- 1000 Laurie, S. S., Christian, K., Kysar, J., Lee, S. M., Lovering, A. T., Macias, B. R., ... & Stenger,  
1001 M. B. (2020). Unchanged cerebrovascular CO<sub>2</sub> reactivity and hypercapnic ventilatory  
1002 response during strict head-down tilt bed rest in a mild hypercapnic environment. *J*  
1003 *Physiol.*
- 1004 Lee, J.K., De Dios, Y.E., Kofman, I.S., Mulavara, A.P., Bloomberg, J.J., Seidler, R.D. Head  
1005 down tilt bed rest plus elevated CO<sub>2</sub> as a spaceflight analog: Effects on cognitive and  
1006 sensorimotor performance. Front. Human Neurosci., 13, 355.
- 1007 Lee, J.K., Koppelmans, V., Riascos, R.F., Hasan, K.M., Pasternak, O., Mulavara, A.P.,  
1008 Bloomberg, J.J., Seidler, R.D., 2019. Spaceflight-Associated Brain White Matter  
1009 Microstructural Changes and Intracranial Fluid Redistribution. JAMA Neurology.  
1010 <https://doi.org/10.1001/jamaneurol.2018.4882>
- 1011 Leech, R., Sharp, D.J., 2014. The role of the posterior cingulate cortex in cognition and disease.  
1012 Brain. <https://doi.org/10.1093/brain/awt162>
- 1013 Liao, Y., Lei, M., Huang, H., Wang, C., Duan, J., Li, H., Liu, X., 2015. The time course of  
1014 altered brain activity during 7-day simulated microgravity. Front. Behav. Neurosci. 9, 124.
- 1015 Liao, Y., Miao, D., Huan, Y., Yin, H., Xi, Y., Liu, X., 2013. Altered Regional Homogeneity with  
1016 Short-term Simulated Microgravity and Its Relationship with Changed Performance in  
1017 Mental Transformation. PLoS ONE. <https://doi.org/10.1371/journal.pone.0064931>

- 1018 Liao, Y., Zhang, J., Huang, Z., Xi, Y., Zhang, Q., Zhu, T., Liu, X., 2012. Altered Baseline Brain  
1019 Activity with 72 h of Simulated Microgravity – Initial Evidence from Resting-State fMRI.  
1020 PLoS ONE. <https://doi.org/10.1371/journal.pone.0052558>
- 1021 Lord, L.-D., Expert, P., Huckins, J.F., Turkheimer, F.E., 2013. Cerebral Energy Metabolism and  
1022 the Brain’s Functional Network Architecture: An Integrative Review. *J Cerebral Blood*  
1023 *Flow & Metab.* <https://doi.org/10.1038/jcbfm.2013.94>
- 1024 Mader, T.H., Gibson, C.R., Pass, A.F., Kramer, L.A., Lee, A.G., Fogarty, J., Tarver, W.J.,  
1025 Dervay, J.P., Hamilton, D.R., Sargsyan, A., Phillips, J.L., Tran, D., Lipsky, W., Choi, J.,  
1026 Stern, C., Kuyumjian, R., Polk, J.D., 2011. Optic disc edema, globe flattening, choroidal  
1027 folds, and hyperopic shifts observed in astronauts after long-duration space flight.  
1028 *Ophthalmology* 118, 2058–2069.
- 1029 Mader, T.H., Robert Gibson, C., 2017. Early Evidence of Vision Impairment after Long-  
1030 Duration Spaceflight. Intracranial Pressure and its Effect on Vision in Space and on Earth.  
1031 [https://doi.org/10.1142/9789814667111\\_0002](https://doi.org/10.1142/9789814667111_0002)
- 1032 Manzey, D., Lorenz, B., 1998. Joint NASA-ESA-DARA Study. Part three: effects of chronically  
1033 elevated CO<sub>2</sub> on mental performance during 26 days of confinement. *Aviat. Space Environ.*  
1034 *Med.* 69, 506–514.
- 1035 Manzey, D., Lorenz, T.B., Heuers, H., Sangals, J., 2000. Impairments of manual tracking  
1036 performance during spaceflight: more converging evidence from a 20-day space mission.  
1037 *Ergonomics* 43, 589–609.
- 1038 Martuzzi, R., Ramani, R., Qiu, M., Shen, X., Papademetris, X., Todd Constable, R., 2011. A  
1039 whole-brain voxel based measure of intrinsic connectivity contrast reveals local changes in  
1040 tissue connectivity with anesthetic without a priori assumptions on thresholds or regions of  
1041 interest. *NeuroImage*. <https://doi.org/10.1016/j.neuroimage.2011.06.075>
- 1042 McDonald, P.V., Basdogan, C., Bloomberg, J.J., Layne, C.S., 1996. Lower limb kinematics  
1043 during treadmill walking after space flight: implications for gaze stabilization. *Exp. Brain*  
1044 *Res.* 112, 325–334.
- 1045 Miller, C.A., Peters, B.T., Brady, R.R., Richards, J.R., Ploutz-Snyder, R.J., Mulavara, A.P.,  
1046 Bloomberg, J.J., 2010. Changes in toe clearance during treadmill walking after long-  
1047 duration spaceflight. *Aviat. Space Environ. Med.* 81, 919–928.
- 1048 Moore, S.T., Dilda, V., Morris, T.R., Yungheer, D.A., MacDougall, H.G., Wood, S.J., 2019.  
1049 Long-duration spaceflight adversely affects post-landing operator proficiency. *Sci. Rep.* 9,  
1050 2677.
- 1051 Mulavara, A.P., Feiveson, A.H., Fiedler, J., Cohen, H., Peters, B.T., Miller, C., Brady, R.,  
1052 Bloomberg, J.J., 2010. Locomotor function after long-duration space flight: effects and  
1053 motor learning during recovery. *Exp. Brain Res.* 202, 649–659.
- 1054 Mulavara, A.P., Peters, B.T., Miller, C.A., Kofman, I.S., Reschke, M.F., Taylor, L.C., Lawrence,  
1055 E.L., Wood, S.J., Laurie, S.S., Lee, S.M.C., Buxton, R.E., May-Phillips, T.R., Stenger,  
1056 M.B., Ploutz-Snyder, L.L., Ryder, J.W., Feiveson, A.H., Bloomberg, J.J., 2018.  
1057 Physiological and Functional Alterations after Spaceflight and Bed Rest. *Med. Sci. Sports*  
1058 *Exerc.* 50, 1961–1980.
- 1059 Paloski, W.H., Bloomberg, J.J., Reschke, M.F., Harm, D.L., 1994. Spaceflight-induced changes  
1060 in posture and locomotion. *J Biomech.* [https://doi.org/10.1016/0021-9290\(94\)91366-8](https://doi.org/10.1016/0021-9290(94)91366-8)
- 1061 Paloski, W.H., Reschke, M.F., Black, F.O., Doxey, D.D., Harm, D.L., 1992. Recovery of  
1062 postural equilibrium control following spaceflight. *Ann. N. Y. Acad. Sci.* 656, 747–754.
- 1063 Pavy-Le Traon, A., Heer, M., Narici, M.V., Rittweger, J., Vernikos, J., 2007. From space to

- 1064 Earth: advances in human physiology from 20 years of bed rest studies (1986-2006). *Eur. J.*  
1065 *Appl. Physiol.* 101, 143–194.
- 1066 Poldrack RA, Mumford JA. Independence in ROI analysis: where is the voodoo? *Soc Cogn*  
1067 *Affect Neurosci* 4: 208–213, 2009.
- 1068 Raichle, M.E., 2010a. Two views of brain function. *Trends in Cog. Sci.*  
1069 <https://doi.org/10.1016/j.tics.2010.01.008>
- 1070 Raichle, M.E., 2010b. The Brain's Dark Energy. *Scientific American.*  
1071 <https://doi.org/10.1038/scientificamerican0310-44>
- 1072 Reschke, M.F., Bloomberg, J.J., Harm, D.L., Paloski, W.H., Layne, C., McDonald, V., 1998.  
1073 Posture, locomotion, spatial orientation, and motion sickness as a function of space flight.  
1074 *Brain Res. Brain Res. Rev.* 28, 102–117.
- 1075 Reschke, M.F., Bloomberg, J.J., Paloski, W.H., Mulavara, A.P., Feiveson, A.H., Harm, D.L.,  
1076 2009. Postural reflexes, balance control, and functional mobility with long-duration head-  
1077 down bed rest. *Aviat. Space Environ. Med.* 80, A45–54.
- 1078 Roberts, D.R., Albrecht, M.H., Collins, H.R., Asemani, D., Rano Chatterjee, A., Vittoria  
1079 Spampinato, M., Zhu, X., Chimowitz, M.I., Antonucci, M.U., 2017. Effects of Spaceflight  
1080 on Astronaut Brain Structure as Indicated on MRI. *New Eng J Med.*  
1081 <https://doi.org/10.1056/nejmoa1705129>
- 1082 Romero, J.E., Coupé, P., Giraud, R., Ta, V.-T., Fonov, V., Park, M.T.M., Mallar Chakravarty,  
1083 M., Voineskos, A.N., Manjón, J.V., 2017. CERES: A new cerebellum lobule segmentation  
1084 method. *NeuroImage.* <https://doi.org/10.1016/j.neuroimage.2016.11.003>
- 1085 Rushworth, M.F., Johansen-Berg, H., Young, S.A., 1998. Parietal cortex and spatial-postural  
1086 transformation during arm movements. *J. Neurophysiol.* 79, 478–482.
- 1087 Sahyoun, C., Floyer-Lea, A., Johansen-Berg, H., Matthews, P.M., 2004. Towards an  
1088 understanding of gait control: brain activation during the anticipation, preparation and  
1089 execution of foot movements. *Neuroimage* 21, 568–575.
- 1090 Schulte, J.H., 1964. Sealed environments in relation to health and disease. *Arch. Environ. Health*  
1091 8:438-452.
- 1092 Smith, S.M., Zwart, S.R., 2018. Spaceflight-related ocular changes: the potential role of genetics,  
1093 and the potential of B vitamins as a countermeasure. *Curr. Opin. Clin. Nutr. Metab. Care*  
1094 21, 481–488.
- 1095 Tootell, R.B.H., Hadjikhani, N.K., Vanduffel, W., Liu, A.K., Mendola, J.D., Sereno, M.I., Dale,  
1096 A.M., 1998. Functional analysis of primary visual cortex (V1) in humans. *Proc. Nat. Acad.*  
1097 *Sci.* <https://doi.org/10.1073/pnas.95.3.811>
- 1098 Van Dijk, K.R.A., Sabuncu, M.R., Buckner, R.L., 2012. The influence of head motion on  
1099 intrinsic functional connectivity MRI. *NeuroImage.*  
1100 <https://doi.org/10.1016/j.neuroimage.2011.07.044>
- 1101 Welch, R.B., Hoover, M., Southward, E.F., 2009. Cognitive performance during prismatic  
1102 displacement as a partial analogue of “space fog.” *Aviat. Space Environ. Med.* 80, 771–780.
- 1103 Whitfield-Gabrieli, S., Nieto-Castanon, A., 2012. Conn: A Functional Connectivity Toolbox for  
1104 Correlated and Anticorrelated Brain Networks. *Brain Connect.* 2, 125–141.
- 1105 Yuan, P., Koppelmans, V., Reuter-Lorenz, P.A., De Dios, Y.E., Gadd, N.E., Wood, S.J., Riascos,  
1106 R., Kofman, I.S., Bloomberg, J.J., Mulavara, A.P., Seidler, R.D., 2016. Increased Brain  
1107 Activation for Dual Tasking with 70-Days Head-Down Bed Rest. *Front. Syst. Neurosci.* 10,  
1108 71.
- 1109 Yuan, P., Koppelmans, V., Reuter-Lorenz, P., De Dios, Y., Gadd, N., Riascos, R., Kofman, I.,

- 1110 Bloomberg, J., Mulavara, A., Seidler, R.D., 2018a. Change of cortical foot activation  
1111 following 70 days of head-down bed rest. *J. Neurophysiol.* 119, 2145–2152.
- 1112 Yuan, P., Koppelmans, V., Reuter-Lorenz, P., De Dios, Y., Gadd, N., Wood, S., Riascos, R.,  
1113 Kofman, I., Bloomberg, J., Mulavara, A., Seidler, R., 2018b. Vestibular brain changes  
1114 within 70 days of head down bed rest. *Hum. Brain Mapp.* 39, 2753–2763.
- 1115 Zeki, S., Watson, J.D., Lueck, C.J., Friston, K.J., Kennard, C., Frackowiak, R.S., 1991. A direct  
1116 demonstration of functional specialization in human visual cortex. *J. Neurosci.* 11, 641–649.
- 1117 Zeng, L.-L., Liao, Y., Shen, H., Liu, X., Hu, D., 2016. Decoding Brain States with Simulated  
1118 Microgravity from Baseline Using Functional Connectivity of Default Network. *Adv. Cogn*  
1119 *Neurodyn.* (V). [https://doi.org/10.1007/978-981-10-0207-6\\_45](https://doi.org/10.1007/978-981-10-0207-6_45)
- 1120 Zhou, Y., Wang, Y., Rao, L.-L., Liang, Z.-Y., Chen, X.-P., Zheng, D., Tan, C., Tian, Z.-Q.,  
1121 Wang, C.-H., Bai, Y.-Q., Chen, S.-G., Li, S., 2014. Disrupted resting-state functional  
1122 architecture of the brain after 45-day simulated microgravity. *Front. Behav Neurosci.*  
1123 <https://doi.org/10.3389/fnbeh.2014.00200>
- 1124 Zwart, S.R., Gibson, C.R., Gregory, J.F., Mader, T.H., Stover, P.J., Zeisel, S.H., Smith, S.M.,  
1125 2017. Astronaut ophthalmic syndrome. *FASEB J.* 31, 3746–3756.
